# Supplementary material for: Tandem Achmatowicz-Knoevenagel protocol: diastereoselective synthesis and anticancer evaluation of cyclopenta[b]pyrane derivatives
Source: Royal Society of Chemistry journal article supplement (doi:10.1039/c0ob00289e), 2010-01-01

## **Tandem Achmatowicz-Knoevenagel protocol: Diastereoselective synthesis and anticancer evaluation of cyclopenta[b]pyrane derivatives**

Taleb H. Al-Tel, \*<sup>†</sup> M. H. Semreen<sup>†</sup> and Wolfgang Voelter<sup>§</sup>

<sup>†</sup>College of Pharmacy, University of Sharjah, P.O.Box 27272, Sharjah, UAE, and Sharjah Institute for Medical Research-Cancer Division, 27272, Sharjah, UAE, <sup>§</sup> Interfakultäres Institut für Biochemie, Eberhard-Karls-Universität Tuebingen, Hoppe-Seyler-Straße, 72076, Tuebingen-Germany.

Tel.: +971 501732950; fax: +971 6 5585812; E-mail: [taltal@sharjah.ac.ae](mailto:taltal@sharjah.ac.ae),

### **Supporting information**

#### **Content**

Procedures and data of all compounds

Copies of NMR spectra of compounds **5a-11g**

#### **page**

1-9

10-36

### **Experimental Section**

All reagents were used as purchased from commercial suppliers without further purification. The reactions were carried out in oven dried or flamed graduated vessels. Solvents were dried and purified by conventional methods prior use. Flash column chromatography was performed with Silica gel 60, 0.040-0.063 mm (230-400 mesh). Aluminium backed plates pre-coated with silica gel 60 (UV254) were used for thin layer chromatography. <sup>1</sup>H, <sup>13</sup>C spectra were recorded on 250 MHz / 63 MHz or 400/ 100.7 MHz spectrometers. Splitting patterns are designated as s, singlet; d, doublet; t, triplet; q, quartet; m, multiplet; br, broad. Chemical shifts (δ) are given in ppm relative to the resonance of their respective residual solvent peak, CHCl<sub>3</sub> (7.27 ppm, 1H; 77.16 ppm, the middle peak, <sup>13</sup>C). Elemental analysis was performed on elemental analyzer. The FD mass spectra were recorded using a mass spectrometer connected to a PDO 11/34 (DEC) computer system. All compounds were determined to be >95% pure by high-performance liquid chromatography (HPLC). Purity of compounds

were determined on a Phenomenex Luna C18- (2), 3 mm column, 4.6 mm i.d. × 30 mm length, with 30-75% acetonitrile/water/0.1% trifluoroacetic acid, 1.0 mL/min elution at rt using 210, 254, or 280 nm wavelength.

**General procedure of the synthesis of compounds 5a and 5b.** A suspension of NaH (174 mg, 4.4 mmol, 65% dispersion in mineral oil) in 10 mL of THF at 0 °C was cautiously treated with *tert*-butyl acetoacetate (0.66 mL, 4 mmol) under argon over a 15 min period. After stirring at this temperature for 30 min, a solution of *n*-BuLi (2.75 mL, 4.4 mmol, 1.6 M in *n*-hexane) was added dropwise over 10 min. The mixture was stirred at 0 °C for 30 min. The resultant milky solution was cooled to -78 °C then 4 mmoles of either furfural (384 mg) or 2-acetylfuran (440 mg) in 10 mL of THF was added. The reaction was then stirred at the same temperature for 1 h, after which the mixture was quenched with a saturated solution of NH<sub>4</sub>Cl (15 mL), extracted with EtOAc (3 × 30 mL), dried over Na<sub>2</sub>SO<sub>4</sub> and concentrated under vacuum to give a yellowish crude oil. The crude was purified through a short silica gel column using hexane/ EtOAc (9:1) as eluent to afford compounds **5a** (917 mg, 95% yield) and **5b** (977 mg, 91% yield) as a yellowish oils.

***tert*-Butyl 5-(2-furyl)-5-hydroxy-3-oxopentanoate (5a).** <sup>1</sup>H NMR (250 MHz, CDCl<sub>3</sub>) δ 7.31 (dd, *J* = 0.8, 1.8 Hz, 1H, H-5'), 6.30 (dd, *J* = 1.8, 3.2 Hz, 1H, H-4'), 6.22 (d, *J* = 3.2 Hz, 1H, H-3'), 5.13 (dd, *J* = 3.3, 8.3 Hz, 1H, H-5), 3.37 (s, 2H, H-2a, H-2b), 3.10 (dd, *J* = 8.3, 17.5 Hz, 1H, H-4a), 2.97 (dd, *J* = 3.3, 17.5 Hz, 1H, H-4b), 1.39 (CO<sub>2</sub>C(CH<sub>3</sub>)<sub>3</sub>); <sup>13</sup>C NMR (63 MHz, CDCl<sub>3</sub>) δ 202.7 (C-2), 166.1 (CO<sub>2</sub>C(CH<sub>3</sub>)<sub>3</sub>), 154.8 (C-2'), 110.3 (C-5'), 110.2 (C-4'), 106.3 (C-3'), 82.3 (CO<sub>2</sub>C(CH<sub>3</sub>)<sub>3</sub>), 63.5 (C-5), 51.1 (C-2), 47.8 (C-4), 27.9 (CO<sub>2</sub>C(CH<sub>3</sub>)<sub>3</sub>); FD-MS *m/z* = 255 (*M* + 1)<sup>+</sup>, Anal. Calcd for C<sub>13</sub>H<sub>18</sub>O<sub>5</sub> (254.28); C, 61.40; H, 7.14. Found: C, 61.20; H, 7.31.

***tert*-Butyl 5-(2-furyl)-5-hydroxy-3-oxohexanoate (5b).** <sup>1</sup>H NMR (250 MHz, CDCl<sub>3</sub>) δ 7.22 (dd, *J* = 0.9, 1.8 Hz, 1H, H-5'), 6.02 (dd, *J* = 1.8, 3.2 Hz, 1H-4'), 6.15 (dd, *J* = 0.9, 3.3 Hz, 1H, H-3'), 3.25 (bs, 2H, H-2a, H-2b), 3.18 (d, *J* = 16.5 Hz, 1H, H-4a), 2.82 (d, *J* = 16.5 Hz, 1H, H-4b), 1.43 (CH<sub>3</sub>), 1.63 (CO<sub>2</sub>C(CH<sub>3</sub>)<sub>3</sub>); <sup>13</sup>C NMR (63 MHz, CDCl<sub>3</sub>) δ 203.0 (C-3), 165.0 (CO<sub>2</sub>C(CH<sub>3</sub>)<sub>3</sub>), 158.5 (C-2'), 110.3 (C-5'),

110.2 (C-4'), 104.7 (C = 3'), 82.0 (CO<sub>2</sub>C(CH<sub>3</sub>)<sub>3</sub>), 70.0 (C-5), 51.7 (C-2), 51.5 (C-4), 28.2 (CO<sub>2</sub>C(CH<sub>3</sub>)<sub>3</sub>), 27.6 (CH<sub>3</sub>); FD-MS m/z = 269 (M + 1)<sup>+</sup>, Anal. Calcd for C<sub>14</sub>H<sub>20</sub>O<sub>5</sub> (268.31); C, 62.67; H, 7.51. Found: C, 62.51; H, 7.42.

**General procedure for the synthesis of compounds 7a and 7b.** A solution of **5a** (1270 mg, 5 mmol) or **5b** (1341.5 mg, 5 mmol) in dichloromethane (40 mL) at 0 °C was treated with *m*-chloroperbenzoic acid (1376 mg, 8.0 mmol of 80% aqueous slurry) which was dissolved in 30 ml DCM, dried over Na<sub>2</sub>SO<sub>4</sub>, filtered, diluted with 50 ml toluene and dried under reduced pressure) and stirred at 0 °C for 6 h. Sodium sulfite solution (30 mL of 10%) was introduced, and the layers were separated after 1 h of rapid mixing. The aqueous phase was washed with saturated sodium bicarbonate solution (30 mL), brine and water (30 mL) prior to drying and solvent evaporation. The crude viscous yellowish oils (**6a** and **6b**) was used in the next step without further purification.

A solution of the crude anomeric mixture of **6a** (852 mg, 3 mmol) or **6b** (810 mg, 3 mmol) in dry toluene (30 ml), freshly prepared piperidinium acetate (3.9 mmol) and 4 °A molecular sieves ( 250 mg) was stirred at 50 °C for 4 h. The hot mixture was filtered and evaporated under reduced pressure. The brown viscous oil was dissolved in EtOAc and extracted with saturated solution of NaHCO<sub>3</sub>, brine, water and dried over Na<sub>2</sub>SO<sub>4</sub>. The crude was purified on a silica gel column using hexane/ EtOAc (7:3) as eluent to afford compounds **7a** (350 mg, 68% yield) and **7b** (425 mg, 73% yield) as amorphous solids.

**tert-Butyl (7aS)-2-hydroxy-6-oxo-2,6,7,7a-tetrahydrocyclopenta[b]pyran-5-carboxylate (7a).** <sup>1</sup>H NMR (250 MHz, CDCl<sub>3</sub>) δ 7.25 (bt, *J* = 10.1 Hz, 1H, H-3), 6.42 (dd, *J* = 3.3, 10.1 Hz, 1H, H-4), 5.60 (bs, 1H, H-2), 5.16 (dd, *J* = 4.7, 6.8 Hz, 1H, H-7a), 2.84 (dd, *J* = 6.8, 17.6 Hz, 1H, H-7), 2.51 (dd, *J* = 4.6, 17.6 Hz, 1H, H-7'), 15.3 (s, 9H, <sup>t</sup>BuO); <sup>13</sup>C NMR (63 MHz, CDCl<sub>3</sub>) δ 199.1, 199.2 (C-6), 170.5, 170.7 (C-4a), 166.2 (CO<sub>2</sub>C(CH<sub>3</sub>)<sub>3</sub>), 142, 138.2 (C-3), 125.0, 123.0 (C-4), 92.7, 89.1 (C-2), 82.0, 71.5 (CO<sub>2</sub>C(CH<sub>3</sub>)<sub>3</sub>), 65.5 (C-7a), 42.5, 42.3 (C-7), 28.2 (CO<sub>2</sub>C(CH<sub>3</sub>)<sub>3</sub>); FD-MS m/z = 252 (M)<sup>+</sup>, Anal. Calcd for C<sub>13</sub>H<sub>16</sub>O<sub>5</sub> (252.10); C, 61.90; H, 6.39. Found: C, 61.85; H, 6.43.

***tert*-Butyl (7a*S*)-2-hydroxy-7a-methyl-6-oxo-2,6,7,7a-tetrahydrocyclopenta[*b*]pyran-5-carboxylate (7b).** <sup>1</sup>H NMR (250 MHz, CDCl<sub>3</sub>) δ 7.13 (m, 2H, H-3), 6.32 (m, 2H, H-4), 5.59, 5.51 (bs, 2H, H-2), 2.57 (m, 4H, H-7,7'), 1.42 (bs, 12H, CH<sub>3</sub>-7a, CO<sub>2</sub>C(CH<sub>3</sub>)<sub>3</sub>); <sup>13</sup>C NMR (63 MHz, CDCl<sub>3</sub>) δ 198.8, 198.5 (C-6), 170.5, 170.4 (C-4a), 161.1 (CO<sub>2</sub>C(CH<sub>3</sub>)<sub>3</sub>), 141.5, 138.5 (C-3), 125.7, 125.3 (C-5), 122.5, 121.3 (C=4), 89.6, 88.7 (C-2), 82.5 (CO<sub>2</sub>C(CH<sub>3</sub>)<sub>3</sub>), 77.5, 73.9 (C-7a) 52.2, 51.9 (C-7), 28.9, 24.2 (CH<sub>3</sub> = 7a), 28.1, 27.8 (CO<sub>2</sub>C(CH<sub>3</sub>)<sub>3</sub>); FD-MS m/z = 266 (M)<sup>+</sup>, Anal. Calcd for C<sub>13</sub>H<sub>16</sub>O<sub>5</sub> (266.12); C, 63.15; H, 6.81. Found: C, 63.09; H, 6.87.

**General procedure for the synthesis of compounds 8a, 8b and 9.** A solution of the anomeric mixture of **7a** (756 mg, 3 mmol) or **7b** (798 mg, 3 mmol) in MeI (15 mL) at rt was treated with 3.0 mmol of Ag<sub>2</sub>O. The progress of reaction was monitored by TLC (12 h). When complete, the reaction mixture was filtered over celite. The filtrate was washed with saturated solutions of sodium sulfite, sodium bicarbonate, brine, dried and evaporated. The residue was purified on silica gel column using hexane/EtOAc (9:1) as an eluent.

***tert*-Butyl (2*S*,7a*S*)-2-methoxy-6-oxo-2,6,7,7a-tetrahydrocyclopenta[*b*]pyran-5-carboxylate (8a).** Yiel: 540 mg, 80%; Significant NMR NOEs are 2-H to 7a-H, 36%; 7a-H to 2-H, 32%. <sup>1</sup>H NMR (250 MHz, CDCl<sub>3</sub>) δ 7.20 (dd, *J* = 0.4, 10.1 Hz, 1H, H-3), 6.30 (dd, *J* = 3.3, 10.1 Hz, 1H, H-4), 5.00 (dd, *J* = 3.3 Hz, 1H, H-2), 4.96 (dd, *J* = 4.8, 6.9 Hz, 1H, H-7a), 3.45 (s, 3H, OMe), 2.80 (dd, *J* = 7.0, 17.6 Hz, 1H, H-7), 2.48 (dd, *J* = 4.5, 17.6 Hz, 1H, H-7'), 1.48 (s, 9H, <sup>t</sup>BuO); <sup>13</sup>C NMR (63 MHz, CDCl<sub>3</sub>) δ 197.8 (C-6), 166.1 (C-4a), 160.8 (CO<sub>2</sub>C(CH<sub>3</sub>)<sub>3</sub>), 137.2 (C-3), 123.0 (C-4), 127.0 (C-5), 95.6 (C-2), 82.5 (CO<sub>2</sub>C(CH<sub>3</sub>)<sub>3</sub>), 65.5 (C-7a), 56.4 (OMe), 42.3 (C-7), 28.0 (CO<sub>2</sub>C(CH<sub>3</sub>)<sub>3</sub>); FD-MS m/z = 266 (M)<sup>+</sup>, Anal. Calcd for C<sub>14</sub>H<sub>18</sub>O<sub>5</sub> (266.16); C 63.12, H 6.82. Found: C 63.51, H 6.55.

***tert*-Butyl (2*S*,7a*S*)-2-methoxy-7a-methyl-6-oxo-2,6,7,7a-tetrahydrocyclopenta[*b*]pyran-5-carboxylate (8b).** Yiel: 742 mg, 94%; Significant NMR NOEs are 2-H to 7a-CH<sub>3</sub>, 31%; 7a-CH<sub>3</sub> to 2-H, 33%. <sup>1</sup>H NMR (250 MHz, CDCl<sub>3</sub>) δ 7.26 (dd, *J* = 1.7, 10.0 Hz, 1H, H-3), 6.62 (dd, *J* = 1.6, 10.0 Hz, 1H, H-4), 5.10 (bd, *J* = 3.1 Hz, 1H, H-2), 3.44 (s, 3H, OMe), 2.74 (d, *J* = 17.1 Hz, 1H, H-7), 2.57 (d, *J* = 17.1 Hz, 1H, H-7'), 1.48 (s, 3H, 7a-CH<sub>3</sub>), 1.47 (s, 9H, (CO<sub>2</sub>C(CH<sub>3</sub>)<sub>3</sub>)); <sup>13</sup>C NMR (63 MHz, CDCl<sub>3</sub>) δ 197.7 (C-6), 169.4 (C-4a), 160.9

(CO<sub>2</sub>C(CH<sub>3</sub>)<sub>3</sub>), 139.0 (C-2), 123.8 (C-3), 123.7 (C-5), 95.6 (C-2), 82.3 (CO<sub>2</sub>C(CH<sub>3</sub>)<sub>3</sub>), 76.7 (C-7a), 55.1 (OMe), 52.1 (C-7), 28.2 (CO<sub>2</sub>C(CH<sub>3</sub>)<sub>3</sub>), 24.3 (7a-CH<sub>3</sub>); FD-MS m/z = 280 (M)<sup>+</sup>, Anal. Calcd for C<sub>15</sub>H<sub>20</sub>O<sub>5</sub> (280.32); C 64.27, H 7.19; Found: C 63.95, H 7.32.

**tert-Butyl (2R,7aS)-2-methoxy-6-oxo-2,6,7,7a-tetrahydrocyclopenta[b]pyran-5-carboxylate (9).** Yield: 138 mg, 20%; Significant NMR NOEs are 2-OMe to 7a-H, 37%; 7a-H to 2-OMe, 29%. <sup>1</sup>H NMR (250 MHz, CDCl<sub>3</sub>) δ 7.25 (dd, *J* = 2.1, 10.1 Hz, 1H, H-3), 6.32 (dd, *J* = 1.4, 10.1 Hz, 1H, H-4), 5.34 (dd, *J* = 0.6, 2.0 Hz, 1H, H-2), 4.74 (dd, *J* = 4.7, 6.9 Hz, 1H, H-7a), 3.47 (s, 3H, OMe), 2.83 (dd, *J* = 6.8, 17.7 Hz, 1H, H-7), 2.55 (dd, *J* = 4.6, 17.7 Hz, 1H, H-7'), 1.47 (s, 9H, (CO<sub>2</sub>C(CH<sub>3</sub>)<sub>3</sub>)); <sup>13</sup>C NMR (63 MHz, CDCl<sub>3</sub>) δ 171.5 (CO<sub>2</sub>C(CH<sub>3</sub>)<sub>3</sub>), 169.7 (C-4a), 141.6 (C-3), 124.8 (C-4), 98.7 (C-2), 82.0 (CO<sub>2</sub>C(CH<sub>3</sub>)<sub>3</sub>), 71.4 (C-7a), 56.0 (OMe), 42.6 (C-7), 28.2 (CO<sub>2</sub>C(CH<sub>3</sub>)<sub>3</sub>); FD-MS m/z = 266 (M)<sup>+</sup>, Anal. Calcd for C<sub>14</sub>H<sub>18</sub>O<sub>5</sub> (266.12); C 63.15, H 6.81; Found: C 62.98, H 7.11.

**tert-Butyl (2S,4aS,5R,7aS)-2-methoxy-7a-methyl-6-oxooctahydrocyclopenta[b]pyran-5-carboxylate (10).** To a stirred solution of **8b** (560 mg, 2.0 mmol) in dry EtOAc/MeOH (1:1, 20 mL) was added Pd/C (56 mg, 15% Pd/C w/w). The mixture was placed under 1.0 atm of H<sub>2</sub> pressure, and the progress of reaction was monitored by TLC. After 2 h, the solid was removed by filtration through a celite pad, which was washed repeatedly with EtOAc. After concentration of the filtrate, the residue was purified on silica gel column (elution with 5% ethyl acetate in hexane) to give **10** as amorphous solid (430 mg, 87%). Significant NMR NOEs are 4a-H to 5-H, 37%; 7a-CH<sub>3</sub> to 2-H, 31%; 7a-CH<sub>3</sub> to 2-H, 35%; 4aH to 2-OMe, 21%. <sup>1</sup>H NMR (250 Mz, CDCl<sub>3</sub>) δ 4.73 (dd, *J* = 2.4, 9.8 Hz, 1H, H-2), 3.29 (d, *J* = 6.2 Hz; 1H, H-5), 3.24 (s, 3H, OMe), 2.79 (d, *J* = 18.4 Hz, ; H-7), 2.45 (ddd, *J* = 2.3, 4.6, 6.2 Hz, 1H, H-4a), 2.31 (d, *J* = 18.4 Hz, 1H, H-7'), 1.97 (m, 2H), 1.74 (dm, *J* = 17.0 Hz, 1H) 1.65 (dm, *J* = 13.0 Hz, 1H), 1.49 (s, 3H, CH<sub>3</sub>-7a), 1.41 (s, 9H, CO<sub>2</sub>C(CH<sub>3</sub>)<sub>3</sub>); <sup>13</sup>C NMR (63 MHz, CDCl<sub>3</sub>) δ 210.3 (C-6), 171.0 (CO<sub>2</sub>C(CH<sub>3</sub>)<sub>3</sub>), 95.7 (C-2), 82.2 (CO<sub>2</sub>C(CH<sub>3</sub>)<sub>3</sub>), 81.7 (C-7a), 60.2 (C-5), 56.8 (OMe), 55.0 (C-7), 51.5 (C-4a), 34.0 (C-3), 28.4(CO<sub>2</sub>C(CH<sub>3</sub>)<sub>3</sub>), 25.4 (C-4), 24.7 (CH<sub>3</sub>-7a); FD-MS m/z = 284 (M)<sup>+</sup>, Anal. Calcd for C<sub>15</sub>H<sub>24</sub>O<sub>5</sub> (284.35); C 63.40, H 8.51; Found: C 63.52, H 8.46.

**General procedure for the synthesis of compounds 11a-f.** The bicyclic  $\beta$ -ketoester **10** derived from the reduction product of **8b** (142 mg, 0.5 mmol) and the desired hydrazine derivative (0.52 mmol) in 20 ml absolute ethanol was refluxed, and the progress of reaction was monitored by TLC. After 6 h, the reaction mixture was concentrated on a rotary evaporator, the residue was purified on silica gel column (elution with 10% ethyl acetate in hexane) to give **11a-f** as amorphous solids.

**(3bS,6S,7aS)-6-Methoxy-7a-methyl-2-(4-methylphenyl)-1,2,3b,4,5,6,7a,8-octahydro-3H-pyrano[3',2':3,4]cyclopenta[1,2-c]pyrazol-3-one (11a).** Yield: 122 mg, 88%;  $^1\text{H}$  NMR (400 Mz,  $\text{CDCl}_3$ )  $\delta$  7.70 (d,  $J = 7.3$  Hz, 2H, Ar-H), 7.17 (d,  $J = 7.3$  Hz, 2H, Ar-H), 4.64 (dd,  $J = 2.7, 7.9$  Hz, 1H, H-2), 3.04 (bd,  $J = 6.2$  Hz; 1H), 3.30 (s, 3H, OMe), 2.25 (dd,  $J = 4.6, 11.3$  Hz, 1H), 2.20 (m, 3H), 2.17 (s, 3H, Ar-CH<sub>3</sub>), 1.90 (m, , 3H), 1.45 (s, 3H, CH<sub>3</sub>-7a);  $^{13}\text{C}$  NMR (100.7 MHz,  $\text{CDCl}_3$ )  $\delta$  159.6, 143.0, 141.7, 137.4, 133.4, 132.6, 125.9, 115.6, 94.2, 84.1, 60.2, 56.8, 55.0, 34.1, 25.4, 24.7, 20.9; FD-MS  $m/z = 314$  (M)<sup>+</sup>, Anal. Calcd for  $\text{C}_{18}\text{H}_{22}\text{N}_2\text{O}_3$  (314.38); C, 68.77; H, 7.05; N, 8.91. Found: C, 68.56; H, 7.24; N, 9.07.

**4-[(3bS,6S,7aS)-6-Methoxy-7a-methyl-3-oxo-1,3,3b,4,5,6,7a,8-octahydro-2H**

**pyrano[3',2':3,4]cyclopenta[1,2-c]pyrazol-2-yl]benzotrile (11b).** Yield: 91.5 mg, 75%  $^1\text{H}$  NMR (400 Mz,  $\text{CDCl}_3$ )  $\delta$  7.81 (dd,  $J = 1.2, 7.4$  Hz, 2H, Ar-H), 7.73 (dd,  $J = 1.1, 7.4$  Hz, 2H, Ar-H), 4.90 (dd,  $J = 3.1, 8.2$  Hz, 1H, H-2), 3.01 (bd,  $J = 6.4$  Hz; 1H), 3.41 (s, 3H, OMe), 2.62 (m, 2H), 2.46 (dd,  $J = 4.3, 10.1$  Hz, 1H), 2.23 (m, 2H), 1.92 (m, , 2H), 1.49 (s, 3H, CH<sub>3</sub>-7a); FD-MS  $m/z = 325$  (M)<sup>+</sup>, Anal. Calcd for  $\text{C}_{18}\text{H}_{19}\text{N}_3\text{O}_3$  (325.14); C, 66.45; H, 5.89; N, 12.91. Found: C, 66.27; H, 5.95; N, 12.70.

**(3bS,6S,7aS)-6-Methoxy-7a-methyl-2-(4-nitrophenyl)-1,2,3b,4,5,6,7a,8-octahydro-3H-pyrano[3',2':3,4]cyclopenta[1,2-c]pyrazol-3-one (11c).** Yield: 104 mg, 78%;  $^1\text{H}$  NMR (400 Mz,  $\text{CDCl}_3$ )  $\delta$  8.34 (dd,  $J = 0.9, 6.9$  Hz, 2H, Ar-H), 8.18 (dd, 1.0,  $J = 6.9$  Hz, 2H, Ar-H),

4.85 (dd,  $J = 2.9, 7.0$  Hz, 1H, H-2), 3.01 (m, 1H), 3.53 (s, 3H, OMe), 3.01 (dd,  $J = 2.1, 4.5$  Hz, 1H), 2.71-2.79 (m, 2H), 2.45(dt,  $J = 3.3, 10.1$  Hz, 1H), 2.20 (m, 2H), 1.89 (m, 2H), 1.47 (s, 3H, CH<sub>3</sub>-7a); <sup>13</sup>C NMR (100.7 MHz, CDCl<sub>3</sub>)  $\delta$  161.6, 144.3, 142.1, 133.0, 122.7, 119.5, 115.0, 94.9, 84.7, 55.7, 49.2, 44.1, 30.8, 22.4, 22.0; FD-MS  $m/z = 345$  (M)<sup>+</sup>, Anal. Calcd for C<sub>17</sub>H<sub>19</sub>N<sub>3</sub>O<sub>5</sub> (345.13); C, 59.12; H, 5.55; N, 12.1. Found: C, 59.22; H, 5.67; N, 12.31.

**(3bS,6S,7aS)-6-Methoxy-2-(4-methoxyphenyl)-7a-methyl-1,2,3b,4,5,6,7a,8-octahydro-3H-pyrano[3',2':3,4]cyclopenta[1,2-c]pyrazol-3-one (11d)**. Yield: 110 mg, 82%; <sup>1</sup>H NMR (400 Mz, CDCl<sub>3</sub>)  $\delta$  7.61 (dd,  $J = 0.9, 6.5$  Hz, 2H, Ar-H), 6.95 (dd, 1.0,  $J = 6.5$  Hz, 2H, Ar-H), 4.93 (dd,  $J = 2.2, 6.2$  Hz, 1H, H-2), 3.77 (s, 3H, Ar-OMe), 3.00 (m, 1H), 3.40 (s, 3H, OMe), 2.75 (dd,  $J = 2.3, 4.4$  Hz, 1H), 1.88 (m, 1H), 2.42(dt,  $J = 3.3, 9.5$  Hz, 1H), 2.20 (m, 1H), 1.50 (s, 3H, CH<sub>3</sub>-7a); <sup>13</sup>C NMR (100.7 MHz, CDCl<sub>3</sub>)  $\delta$  161.75, 132.5, 132.4, 115.1, 112.6, 94.2, 84.6, 55.7, 55.6, 46.1, 39.8, 32.8, 25.7, 25.2; FD-MS  $m/z = 330$  (M)<sup>+</sup>, Anal. Calcd for C<sub>18</sub>H<sub>22</sub>N<sub>2</sub>O<sub>4</sub> (330.16); C, 65.44; H, 6.71; N, 8.48, 12.1. Found: C, 65.53; H, 6.65; N, 8.52.

**(3bS,6S,7aS)-2-(4-Chlorophenyl)-6-methoxy-7a-methyl-1,2,3b,4,5,6,7a,8-octahydro-3H-pyrano[3',2':3,4]cyclopenta[1,2-c]pyrazol-3-one (11e)**. Yield: 120.7 mg, 85%; <sup>1</sup>H-NMR (400 Mz, CDCl<sub>3</sub>)  $\delta$  7.85 (dd,  $J = 0.8, 6.1$  Hz, 2H, Ar-H), 7.30 (dd, 0.9,  $J = 6.1$  Hz, 2H, Ar-H), 5.00 (dd,  $J = 2.3, 5.7$  Hz, 1H, H-2), 3.03 (m, 1H), 3.99 (s, 3H, OMe), 2.76 (dd,  $J = 2.2, 4.1$  Hz, 1H), 2.22-2.46 (m, 3H), 1.89 (m, 3H), 1.47 (s, 3H, CH<sub>3</sub>-7a); <sup>13</sup>C NMR (100.7 MHz, CDCl<sub>3</sub>)  $\delta$  160.9, 151.8, 151.3, 139.0, 132.4, 116.8, 115.1, 94.7, 84.6, 55.7, 49.3, 46.1, 30.2, 21.8, 21.4; FD-MS  $m/z = 334$  (M)<sup>+</sup>, Anal. Calcd for C<sub>17</sub>H<sub>19</sub>ClN<sub>2</sub>O<sub>3</sub> (334.11); C, 60.99; H, 5.72; Cl, 10.59; N, 8.37. Found: C, 60.85; H, 5.79; Cl, 10.61; N, 8.42.

**(3bS,6S,7aS)-2-(1H-Indol-2-yl)-6-methoxy-7a-methyl-1,2,3b,4,5,6,7a,8-octahydro-3H-pyrano[3',2':3,4]cyclopenta[1,2-c]pyrazol-3-one (11f)**. Yield: 98 mg, 76%; <sup>1</sup>H NMR (400 Mz, CDCl<sub>3</sub>)  $\delta$  10.62 (bs, 1H), 10.26 (s, 1H), 7.73 (d,  $J = 1.8$  Hz, 1H), 7.52 (s, 1H), 7.37 (d,

$J = 2.0$  Hz, 1H), 7.16 (t,  $J = 1.8, 3.2$  Hz, 1H), 6.50 (t,  $J = 1.8, 3.3$  Hz, 1H), 4.84 (dd,  $J = 2.1, 5.2$  Hz, 1H, H-2), 3.00 (m, 1H), 3.49 (s, 3H, OMe), 2.77 (m, 1H), 2.21-2.46 (m, 2H), 1.88 (m, 2H), 1.47 (s, 3H, CH<sub>3</sub>-7a); FD-MS  $m/z = 334$  (M)<sup>+</sup>, Anal. Calcd for C<sub>19</sub>H<sub>21</sub>N<sub>3</sub>O<sub>3</sub> (339.16); C, 67.24; H, 6.24; N, 12.38. Found: C, 67.33; H, 6.13; N, 12.45.

**(3bS,6S,7aS)-6-Methoxy-7a-methyl-2-pyridin-2-yl-1,2,3b,4,5,6,7a,8-octahydro-3H-pyrano[3',2':3,4]cyclopenta[1,2-c]pyrazol-3-one (11g)**. Yield: 119 mg, 79%; <sup>1</sup>H NMR (400 Mz, CDCl<sub>3</sub>)  $\delta$  8.41 (d,  $J = 1.1$  Hz, 1H), 7.92 (d,  $J = 0.9$  Hz, 1H), 7.63 (t,  $J = 1.3$  Hz, 1H), 6.98 (t,  $J = 1.2$  Hz, 1H), 5.19 (t,  $J = 4.4$  Hz, 1H, H-2), 3.08 (m, 1H), 3.77 (s, 3H, OMe), 2.65 (m, 2H), 2.21-2.38 (m, 3H), 1.85 (m, 2H), 1.42 (s, 3H, CH<sub>3</sub>-7a); FD-MS  $m/z = 301$  (M)<sup>+</sup>, Anal. Calcd for C<sub>16</sub>H<sub>19</sub>N<sub>3</sub>O<sub>3</sub> (301.14); C, 63.77; H, 6.36; N, 13.94. Found: C, 63.65; H, 6.42; N, 13.81.

**Molecular Modeling.** ChemBio3D Ultra 11 was used to calculate the thermodynamically more preferred conformations of compounds **10** and **10a** using force field MM2 method.<sup>18</sup>

**In vitro cytotoxicity assay.** The cytotoxic activity of the cyclopenta[b]pyrane derivatives **11a-11g** was determined using a standard (MTT)-based colorimetric assay.<sup>12</sup> This assay quantifies viable cells by observing the reduction of tetrazolium salt, MTT, to formazan crystals by the cells. Based on the absorbance of the cell samples after the test is carried out, cell viability can be measured. Cells were plated with nutritional medium in 96 well plates (2000 and 5000 cells/well for HCT116, SK-N-SH and the non-tumorigenic cell line derived from breast tissue (MCF10A)). After 24 hours, cells were treated with different concentrations (0.1, 0.5, 1, 3 and 10  $\mu$ M) of the new compounds, each concentration in 3 repetitions. The plates were incubated with the pyrazolone derivatives for 72 hours. At the end of treatment, cells were washed with PBS solution. Then, 100  $\mu$ l of fresh medium and 50  $\mu$ l from a stock solution of MTT (3mg/ml PBS)



were added to each well. After 4 hours of incubation at 37 °C, the medium was discarded and 100 µl of DMSO solution were added to each well, in order to dissolve the crystals that were formed. After a 30 minute period, the absorbance of the samples was measured by an Elisa reader. The absorbance data were converted to % cell viability. The IC<sub>50</sub> were calculated using Graphpad Prism software.

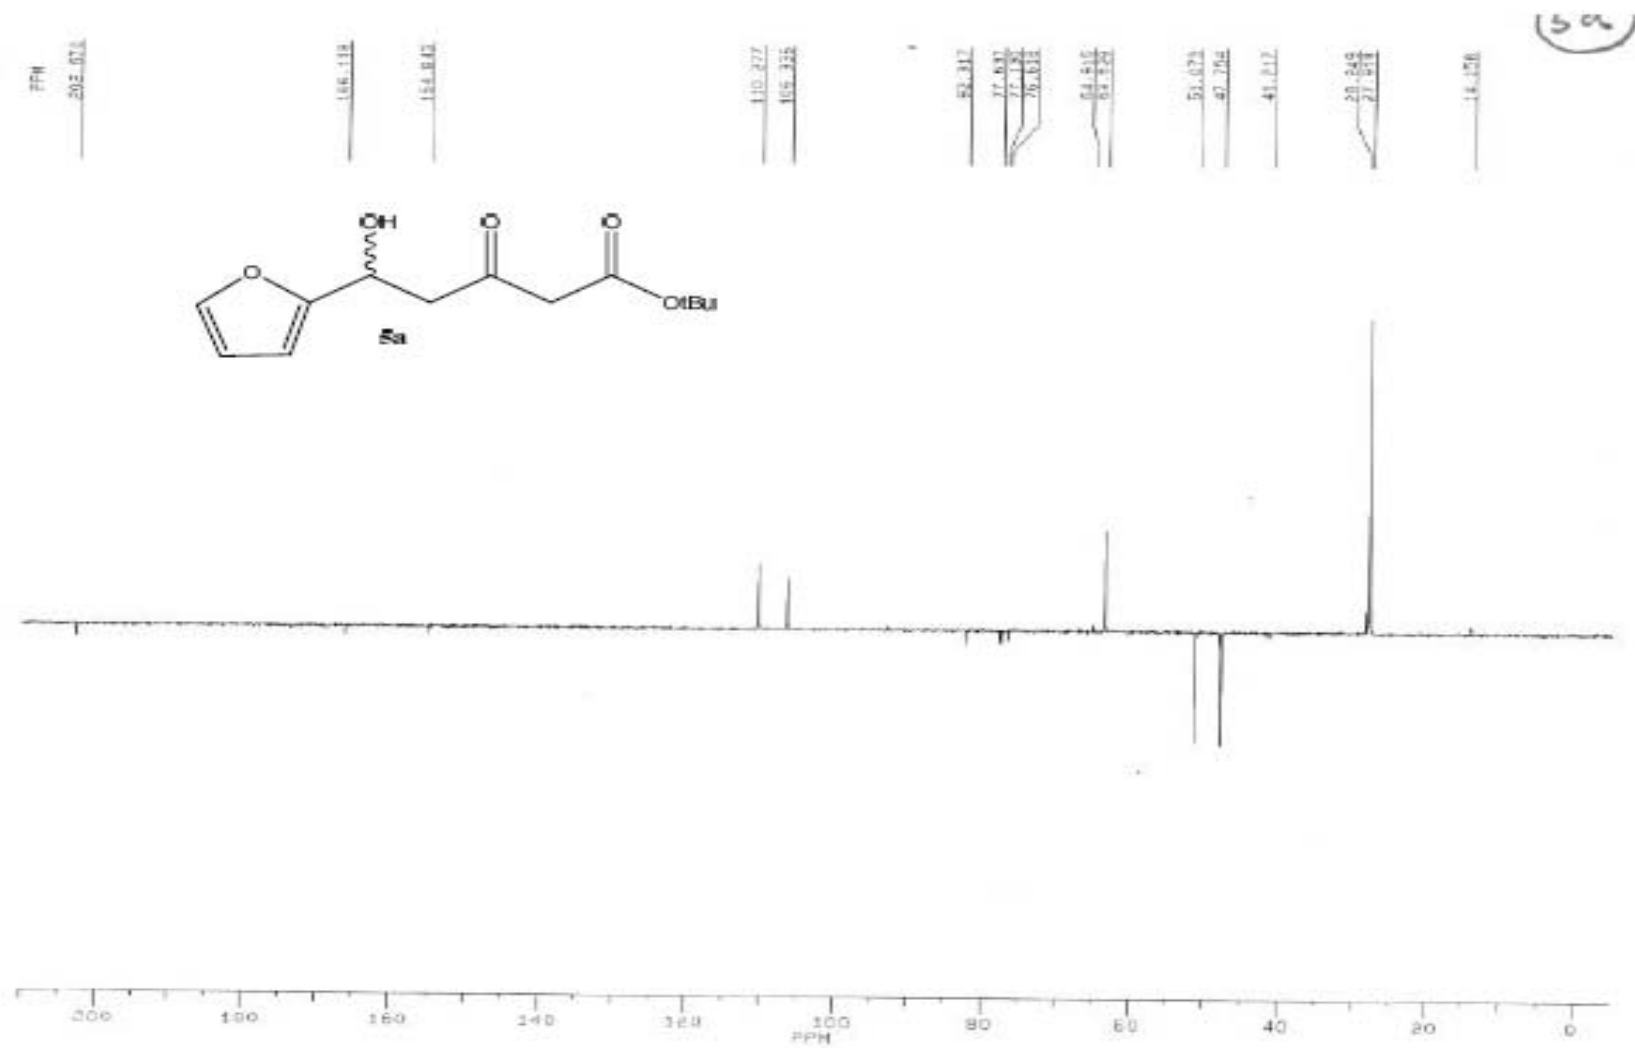

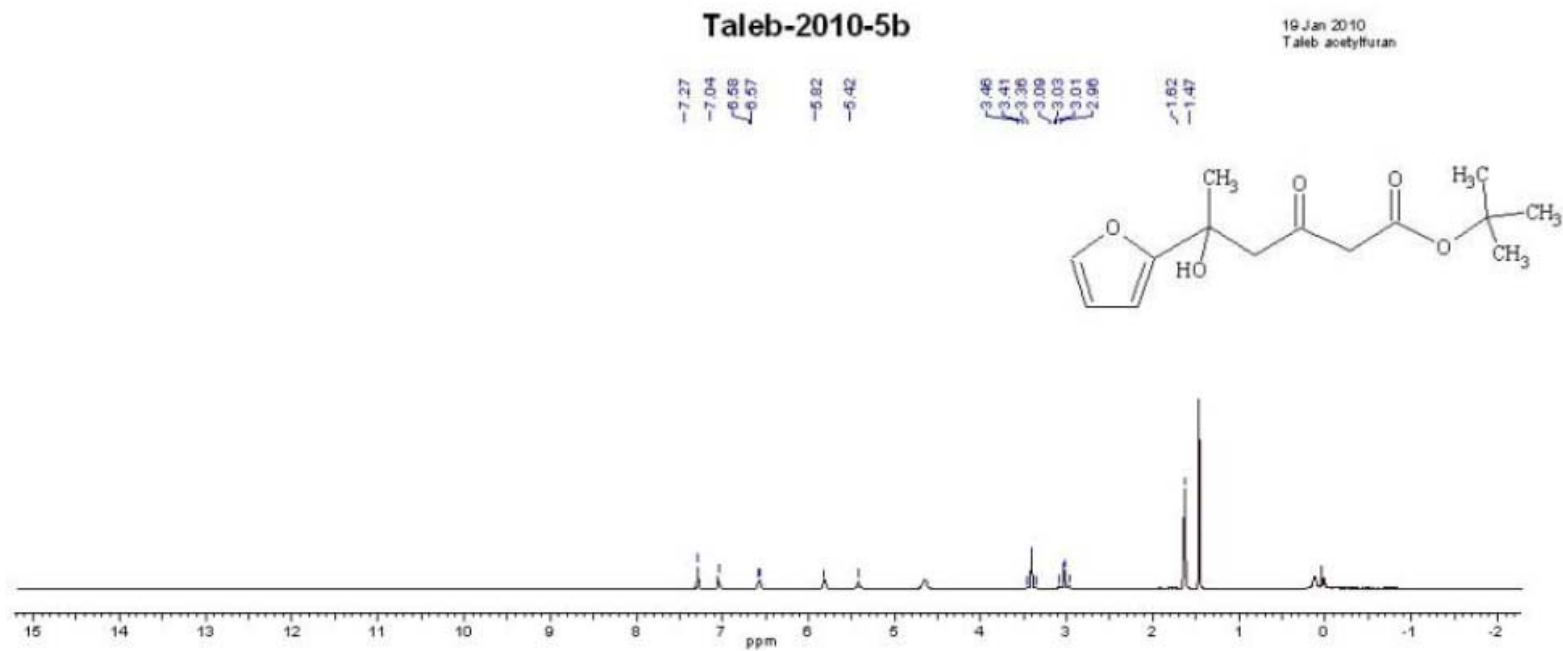

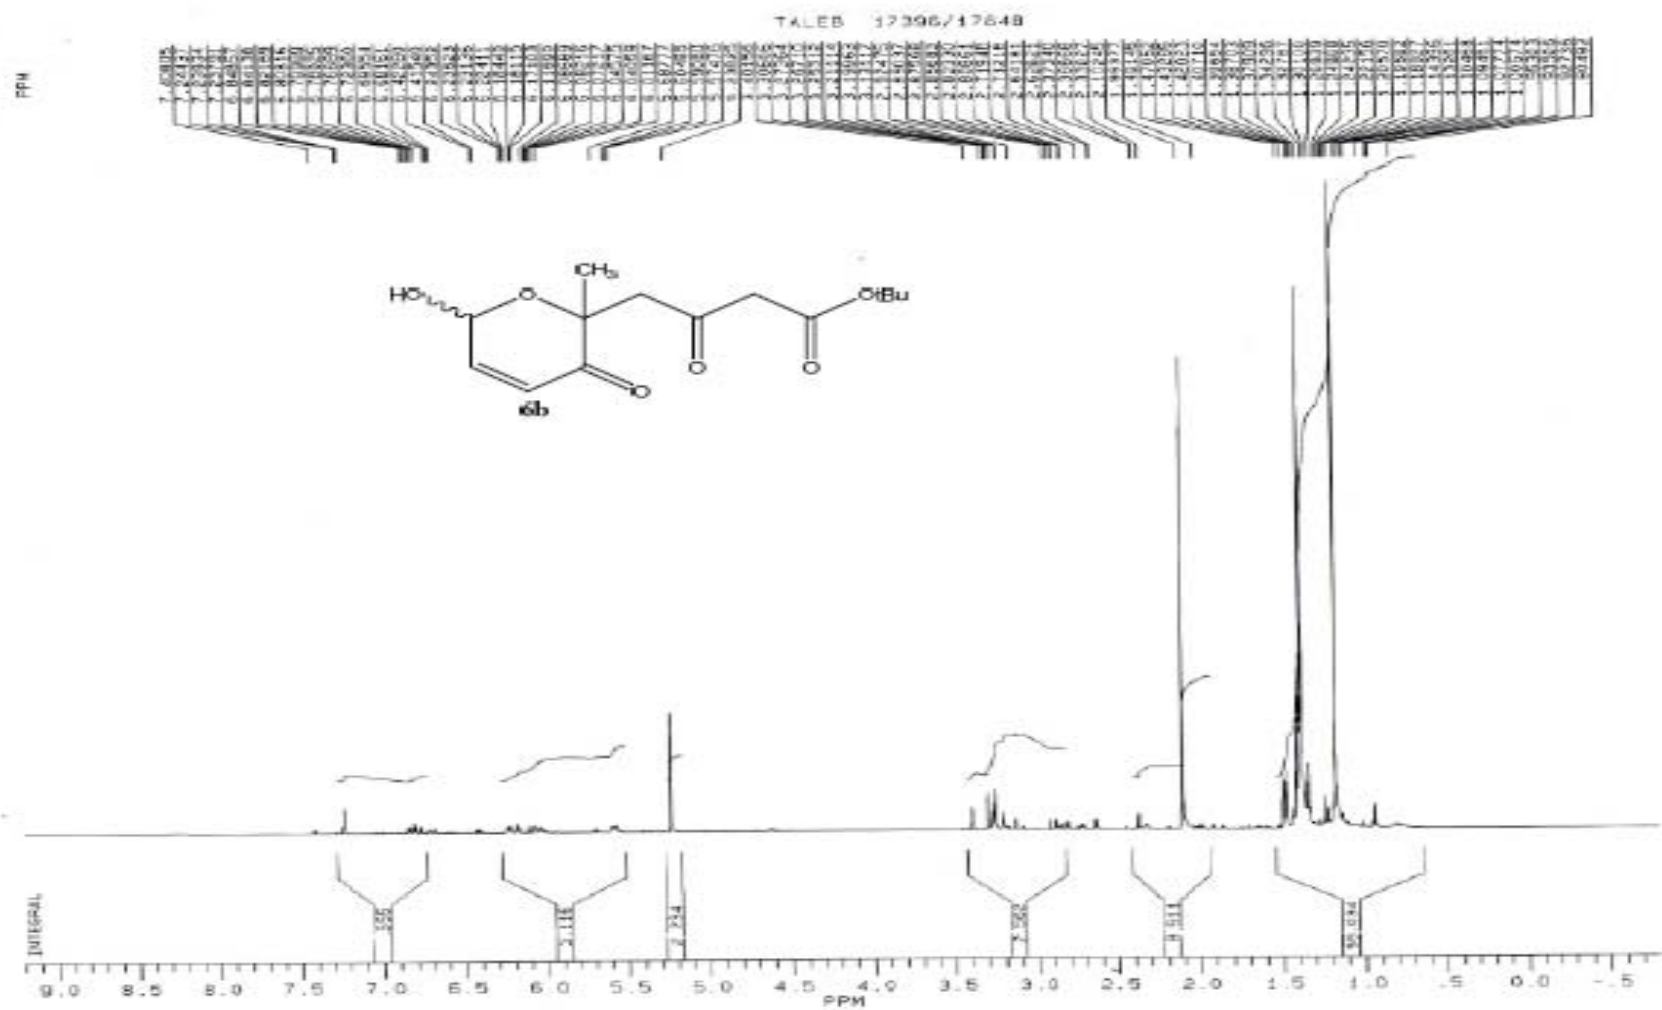

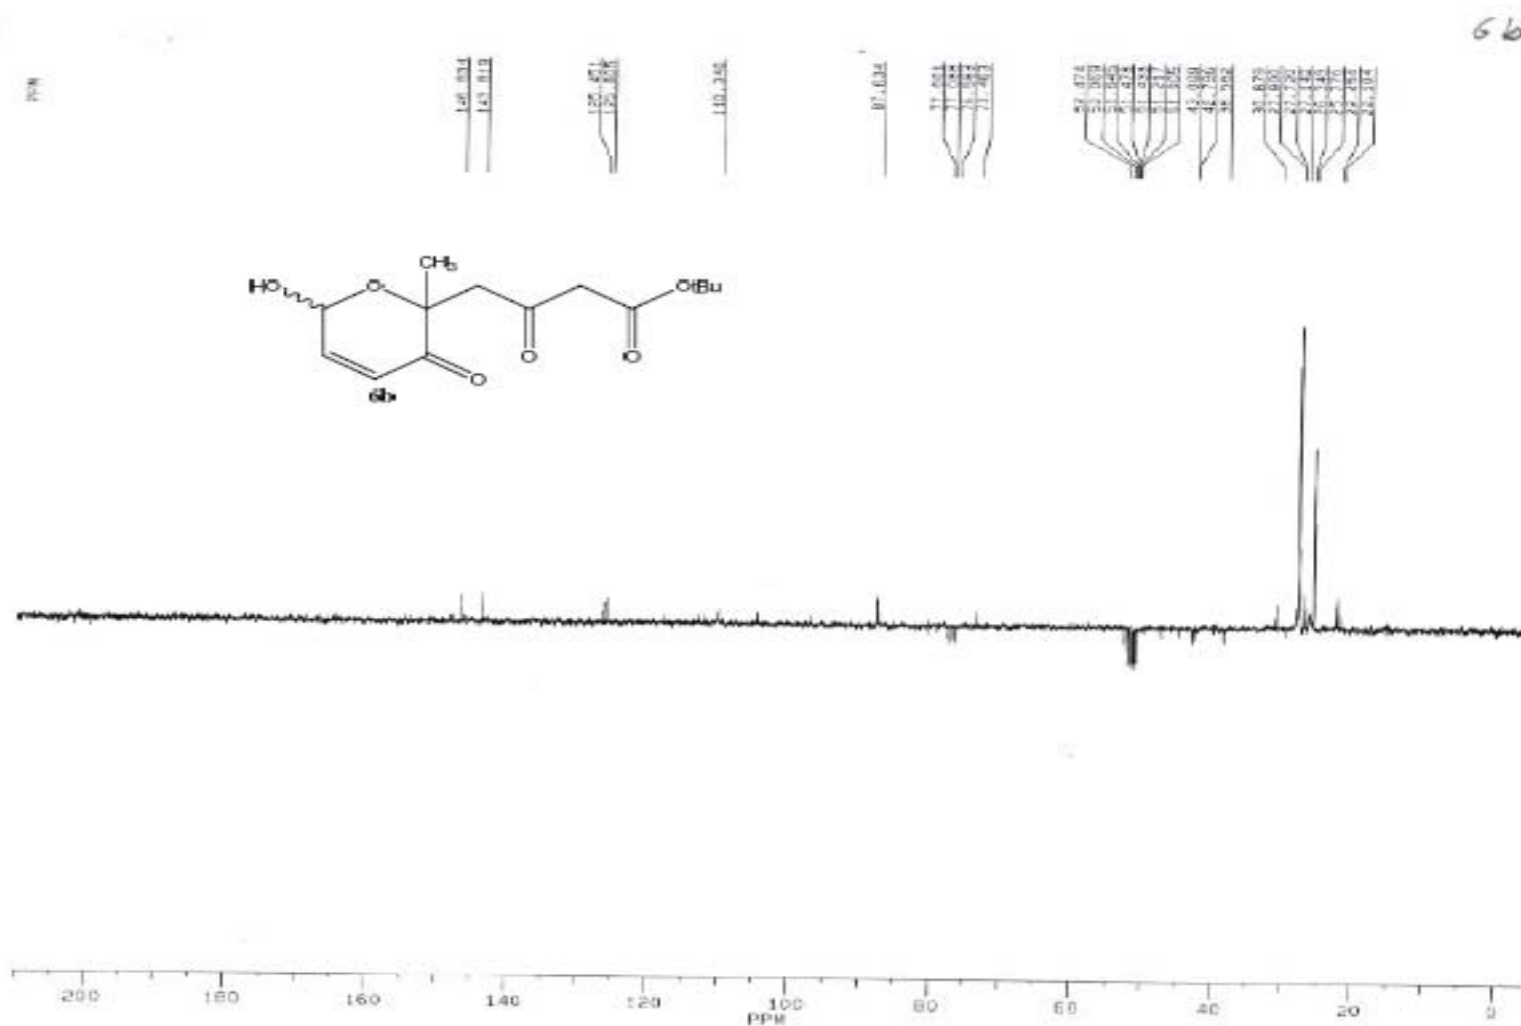



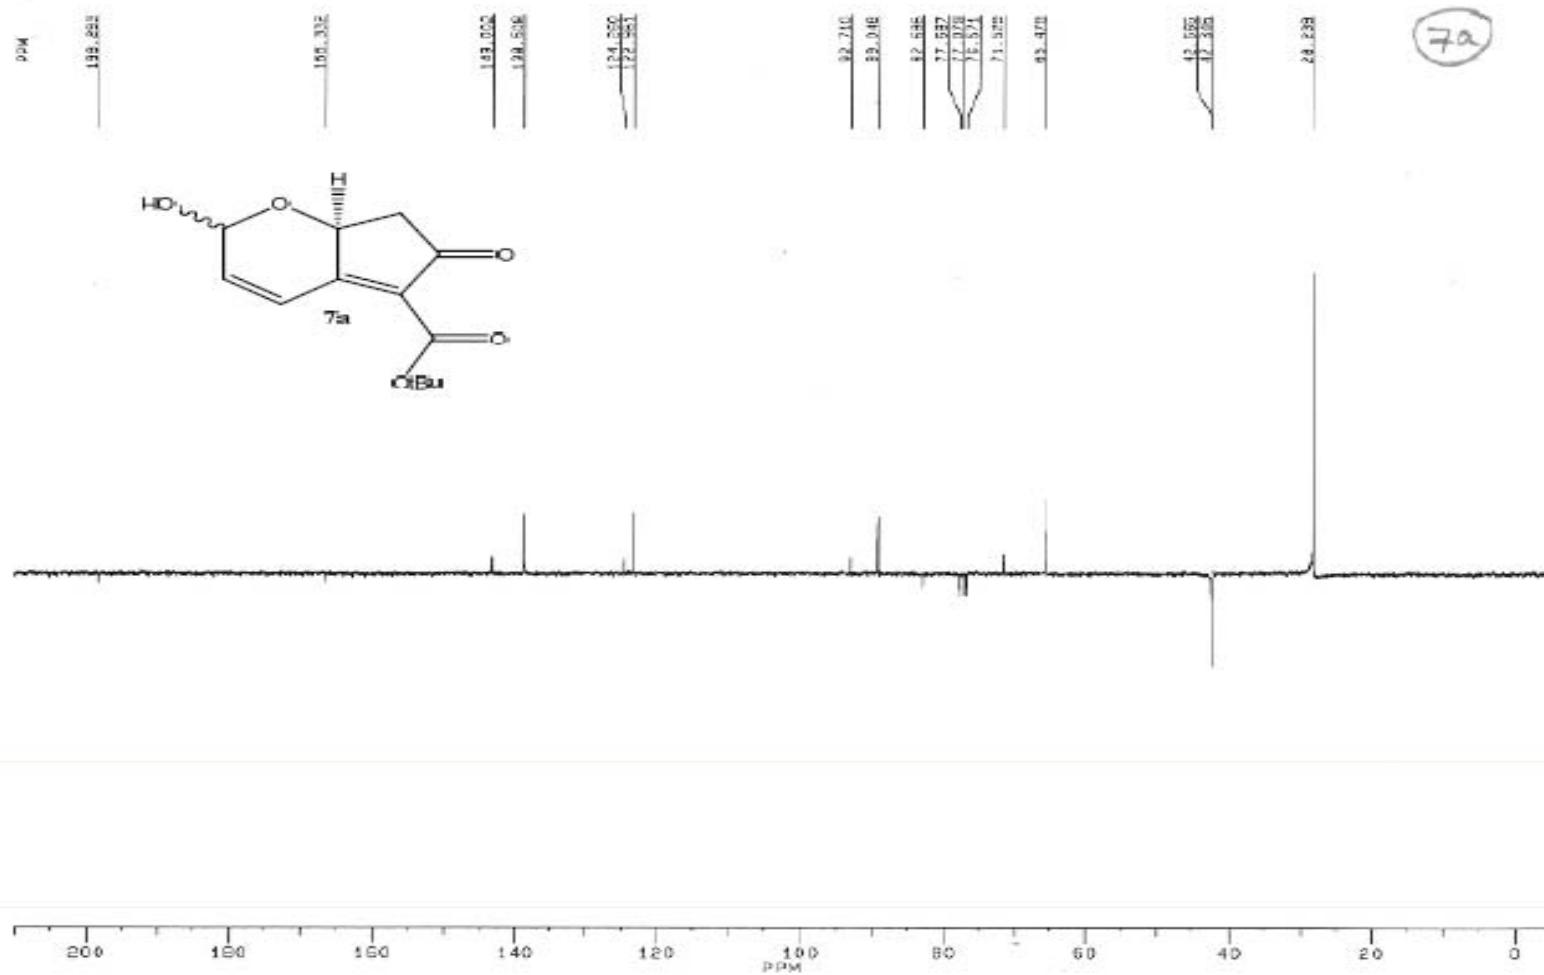





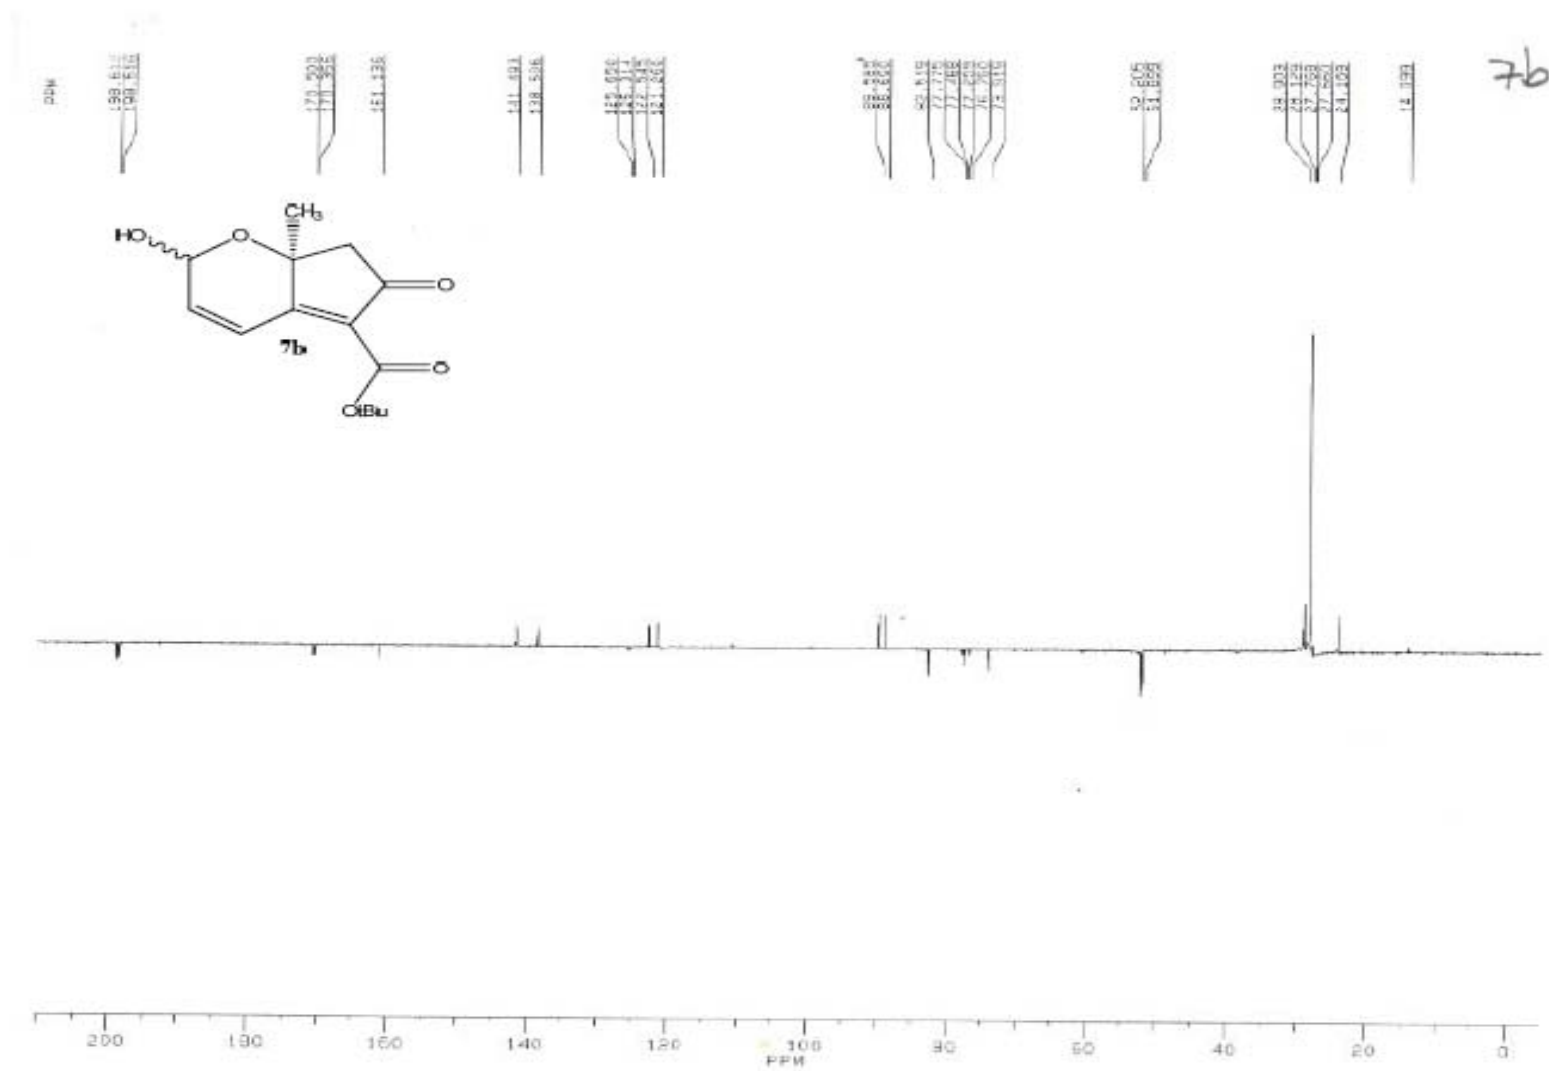

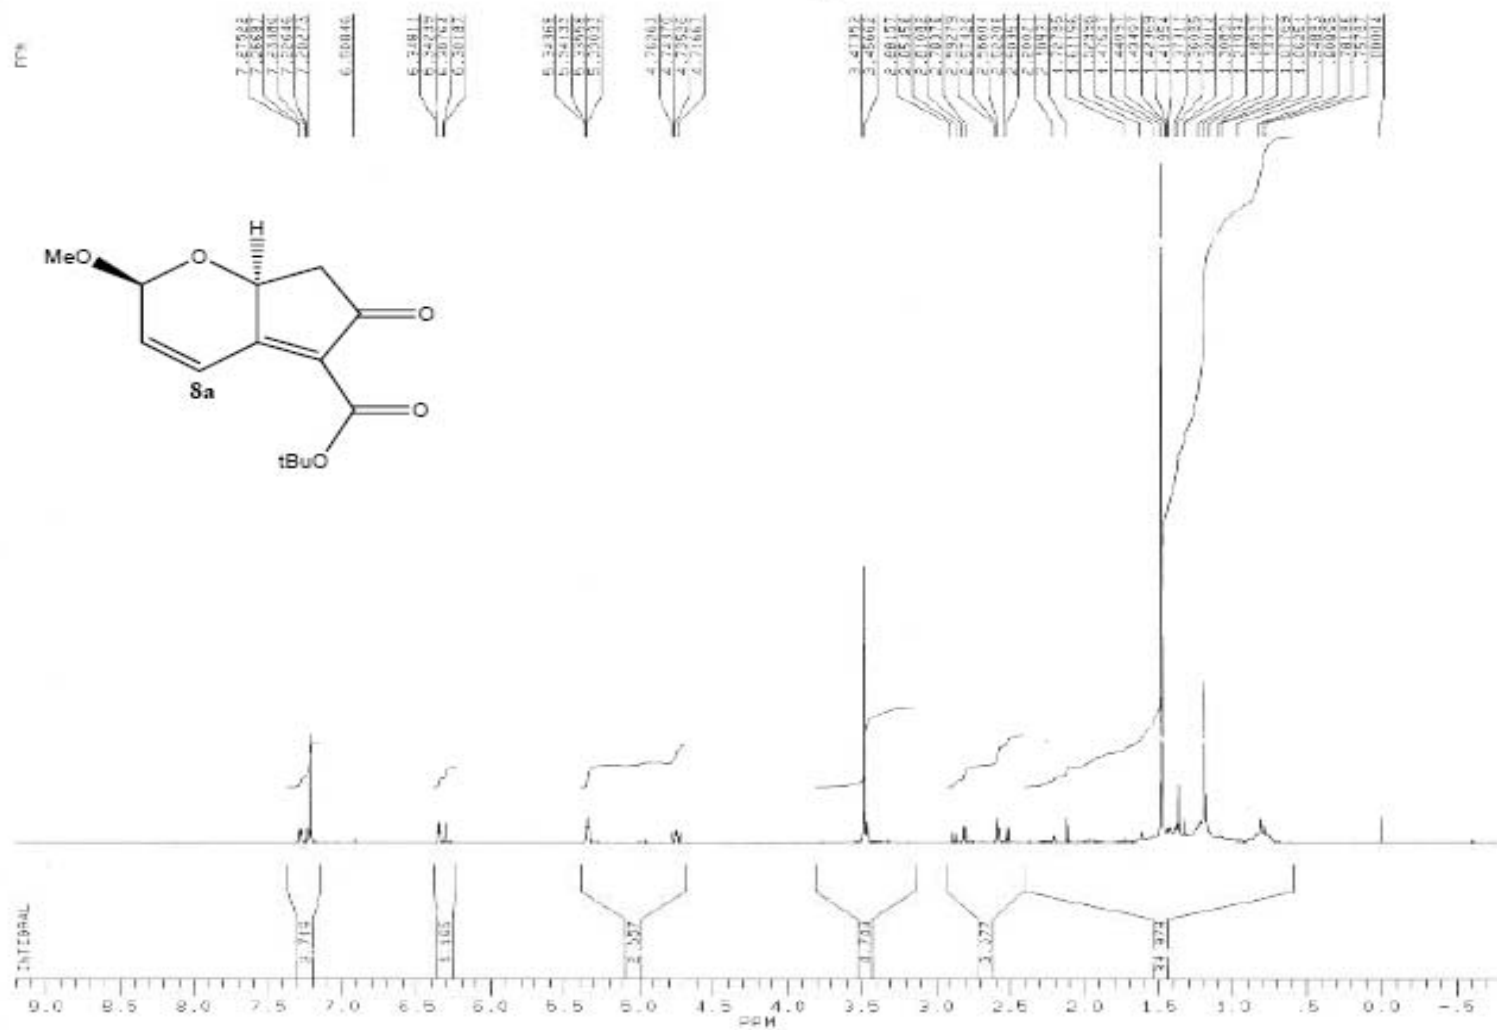

8a

DC151  
AU PH  
XDC  
DATE  
TIME  
  
SA NA  
SA NO  
SOLVE  
SF  
SF02  
SFB  
SY 10  
Q1  
Q1 3  
TD 3  
SM  
SMG  
HZ/PT  
  
R0  
AQ  
RG  
NS  
TE  
  
QE  
FW  
QP  
DP 6  
  
LD  
GD  
NC  
YX  
CY  
F1  
F2  
HZ/CH  
PDM/C  
SR  
  
D1  
P0  
RGA  
R0  
PW  
DC  
NS  
D3

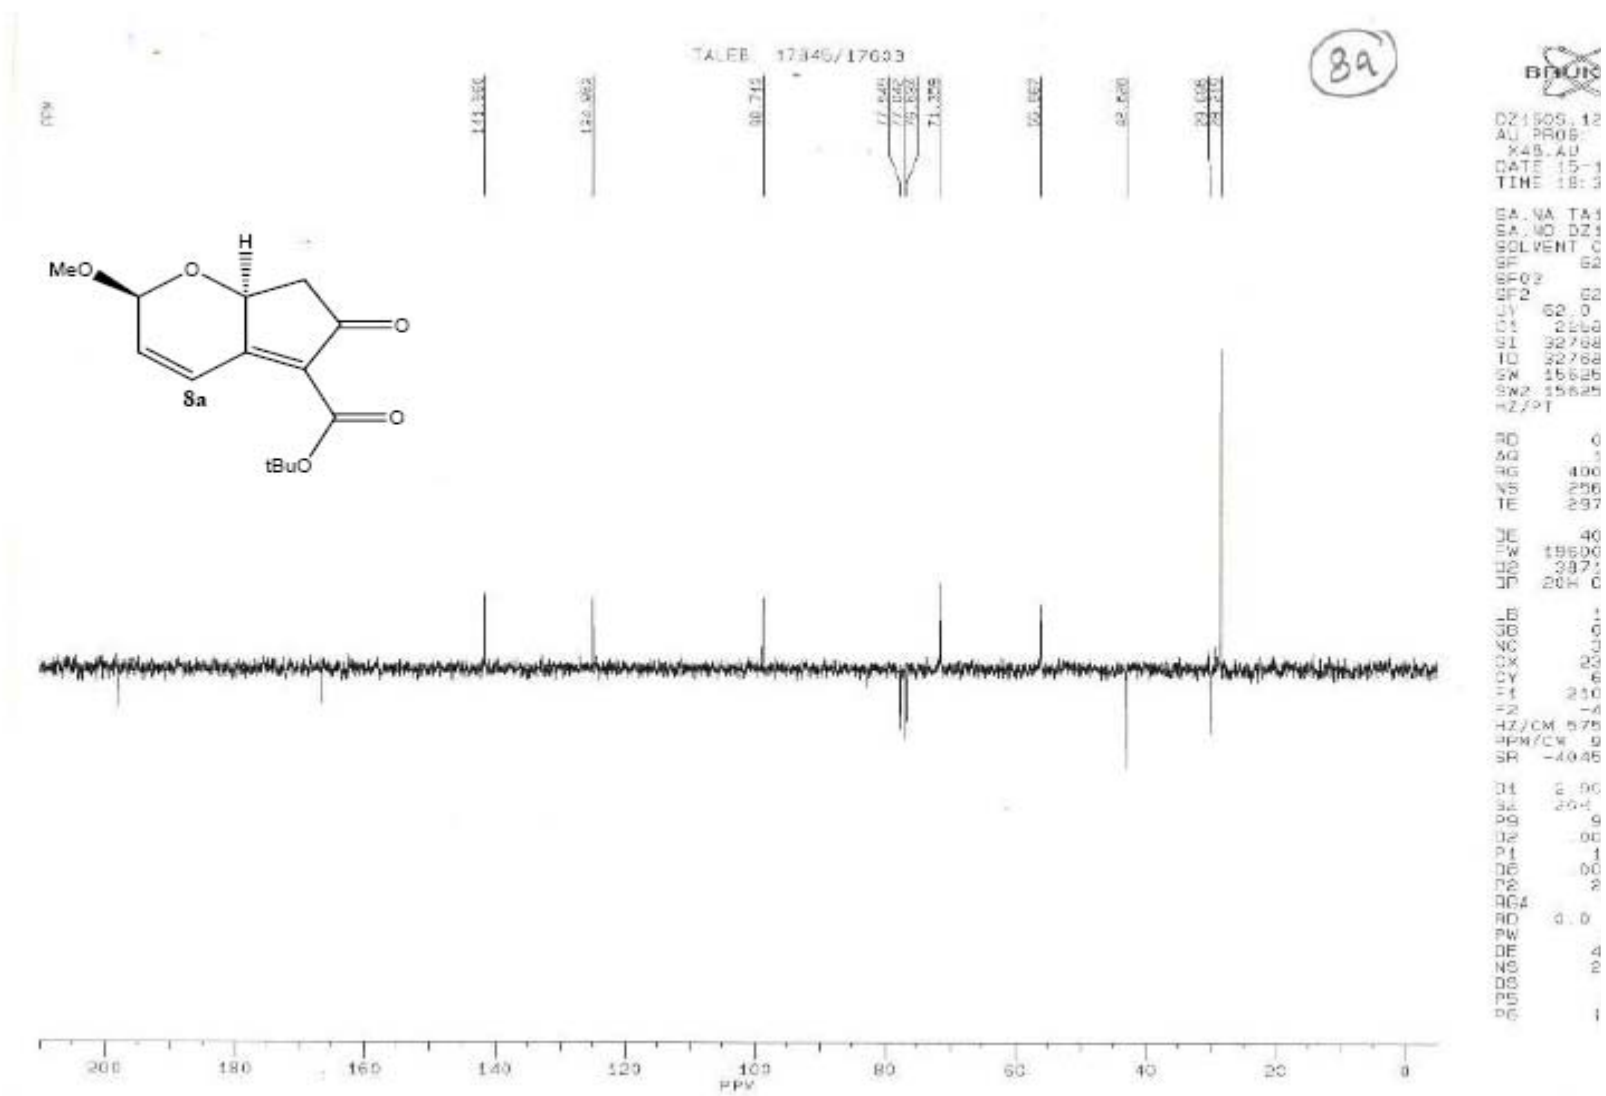

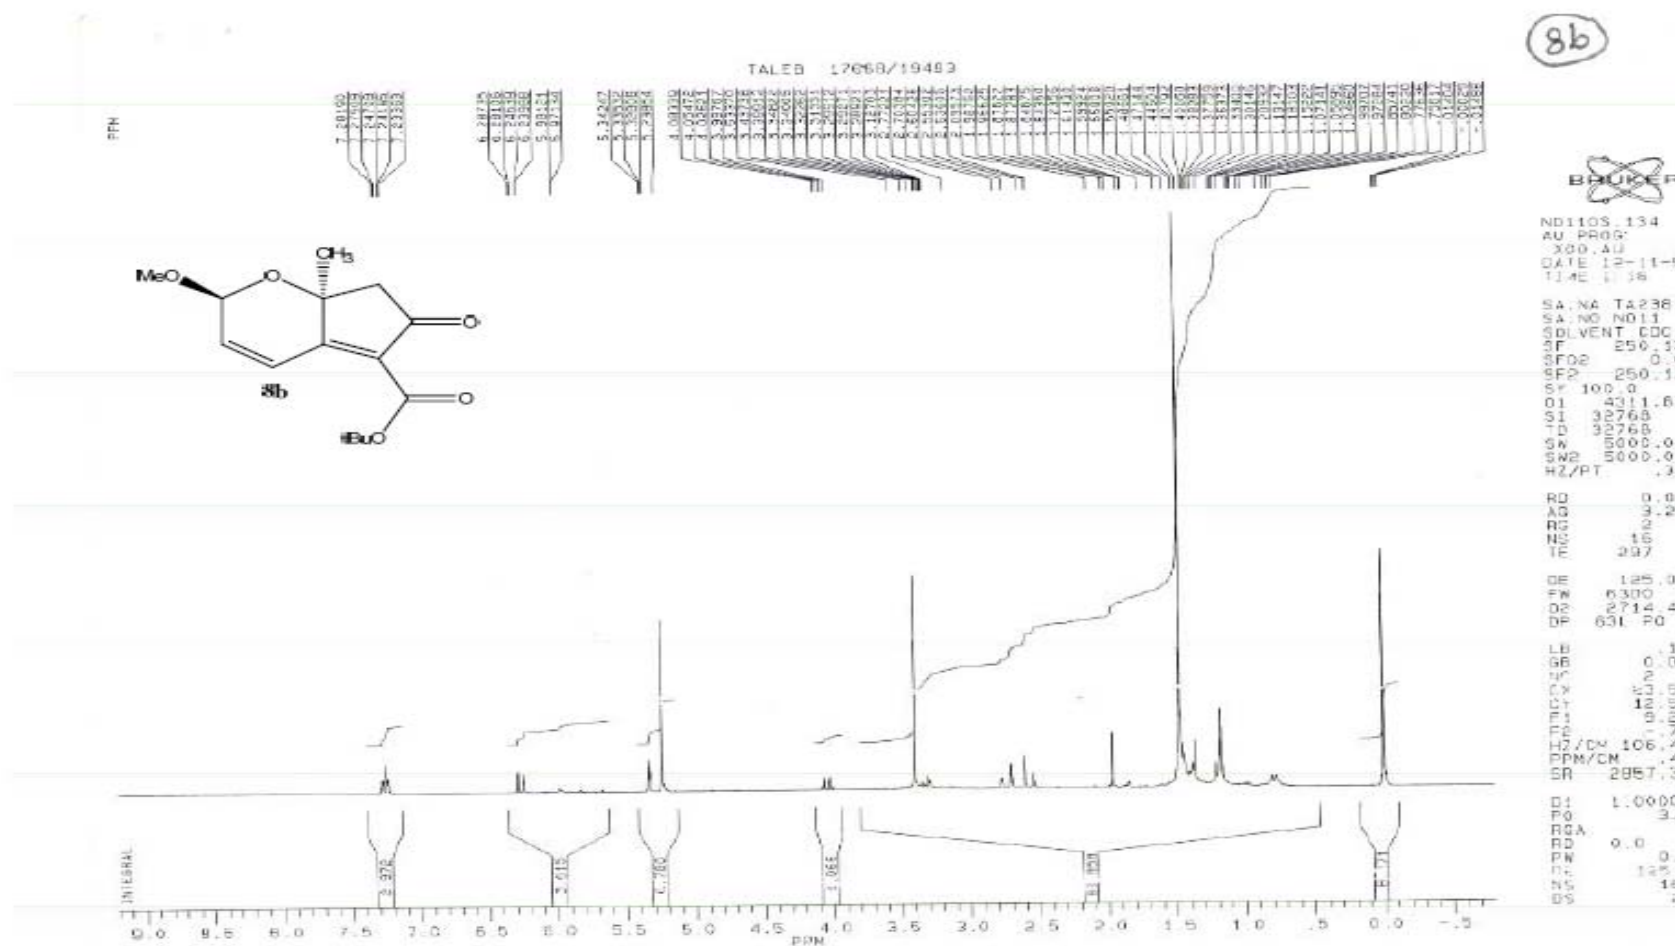

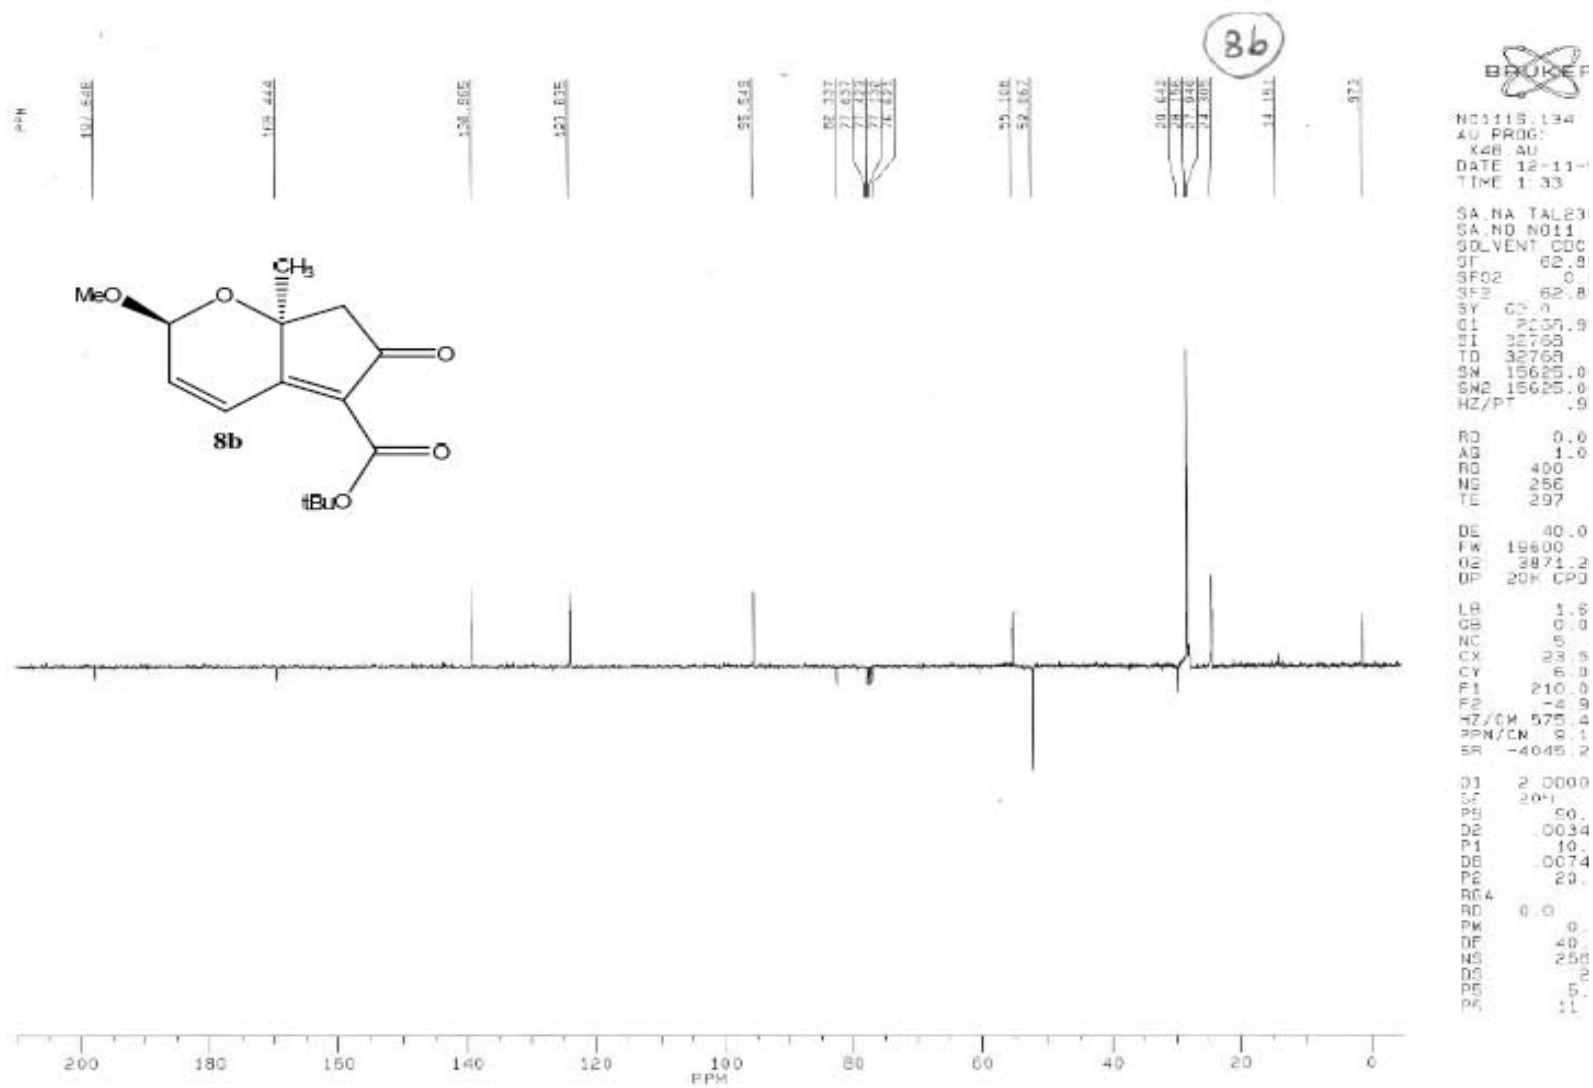

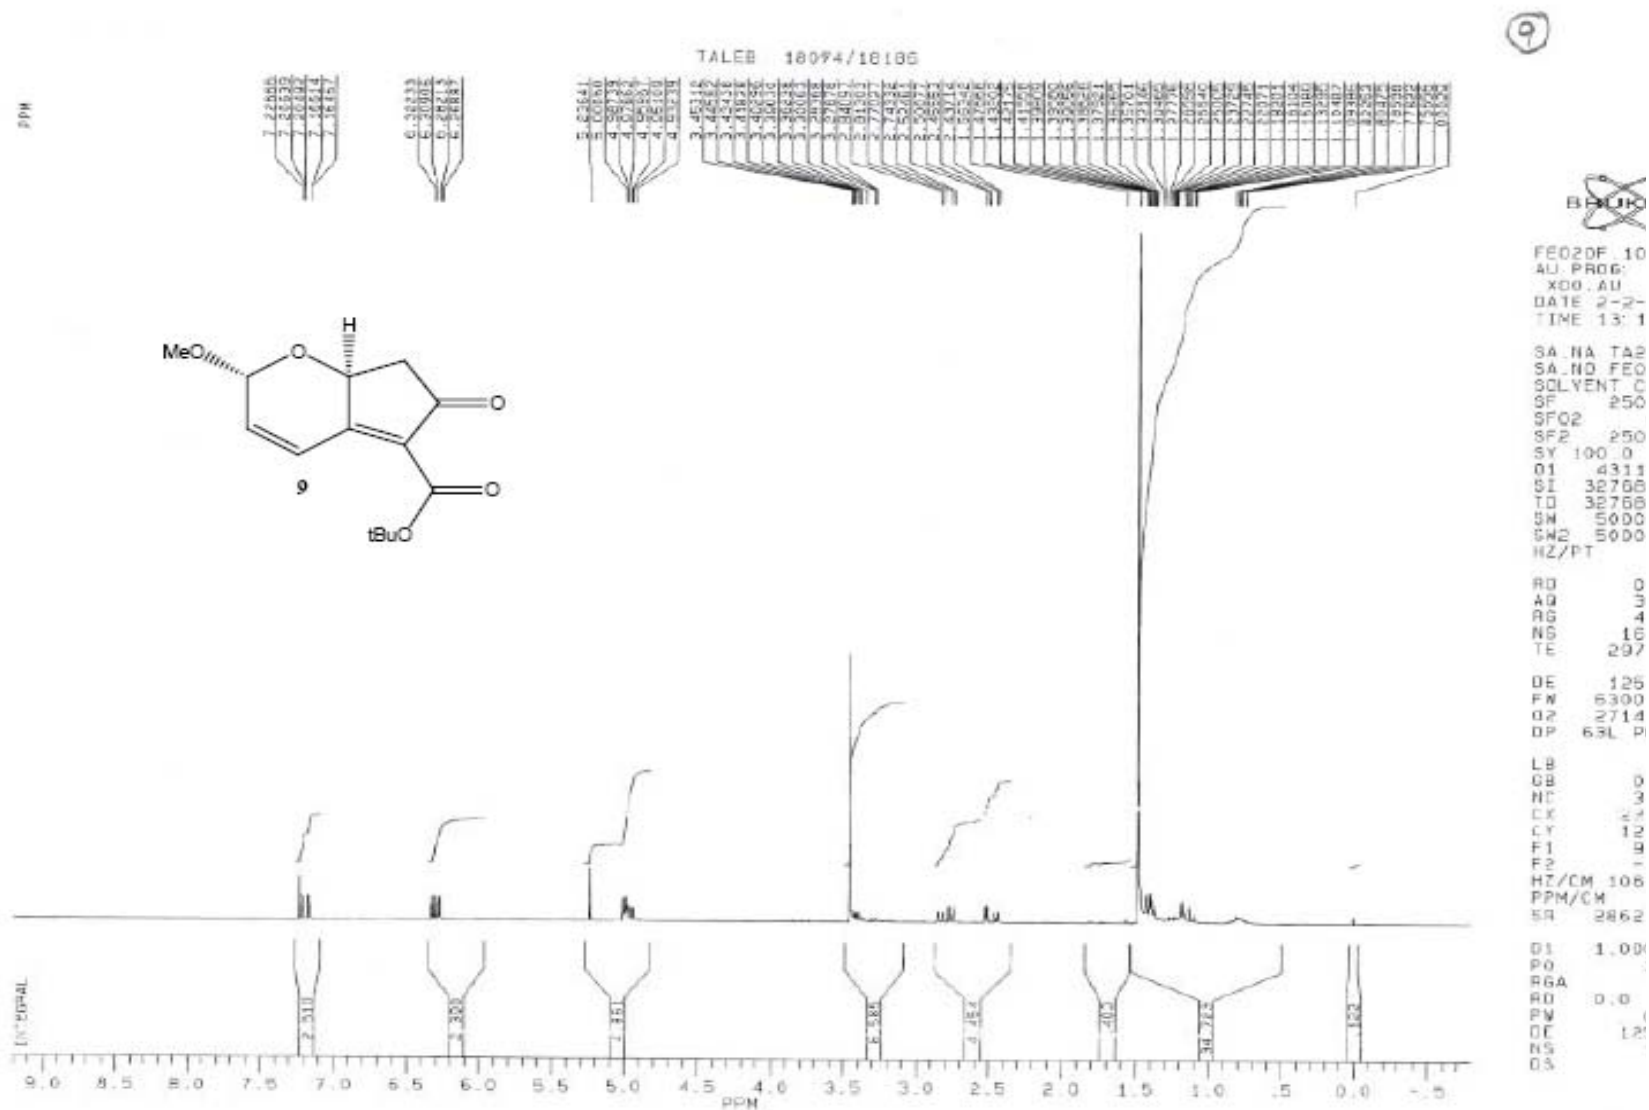

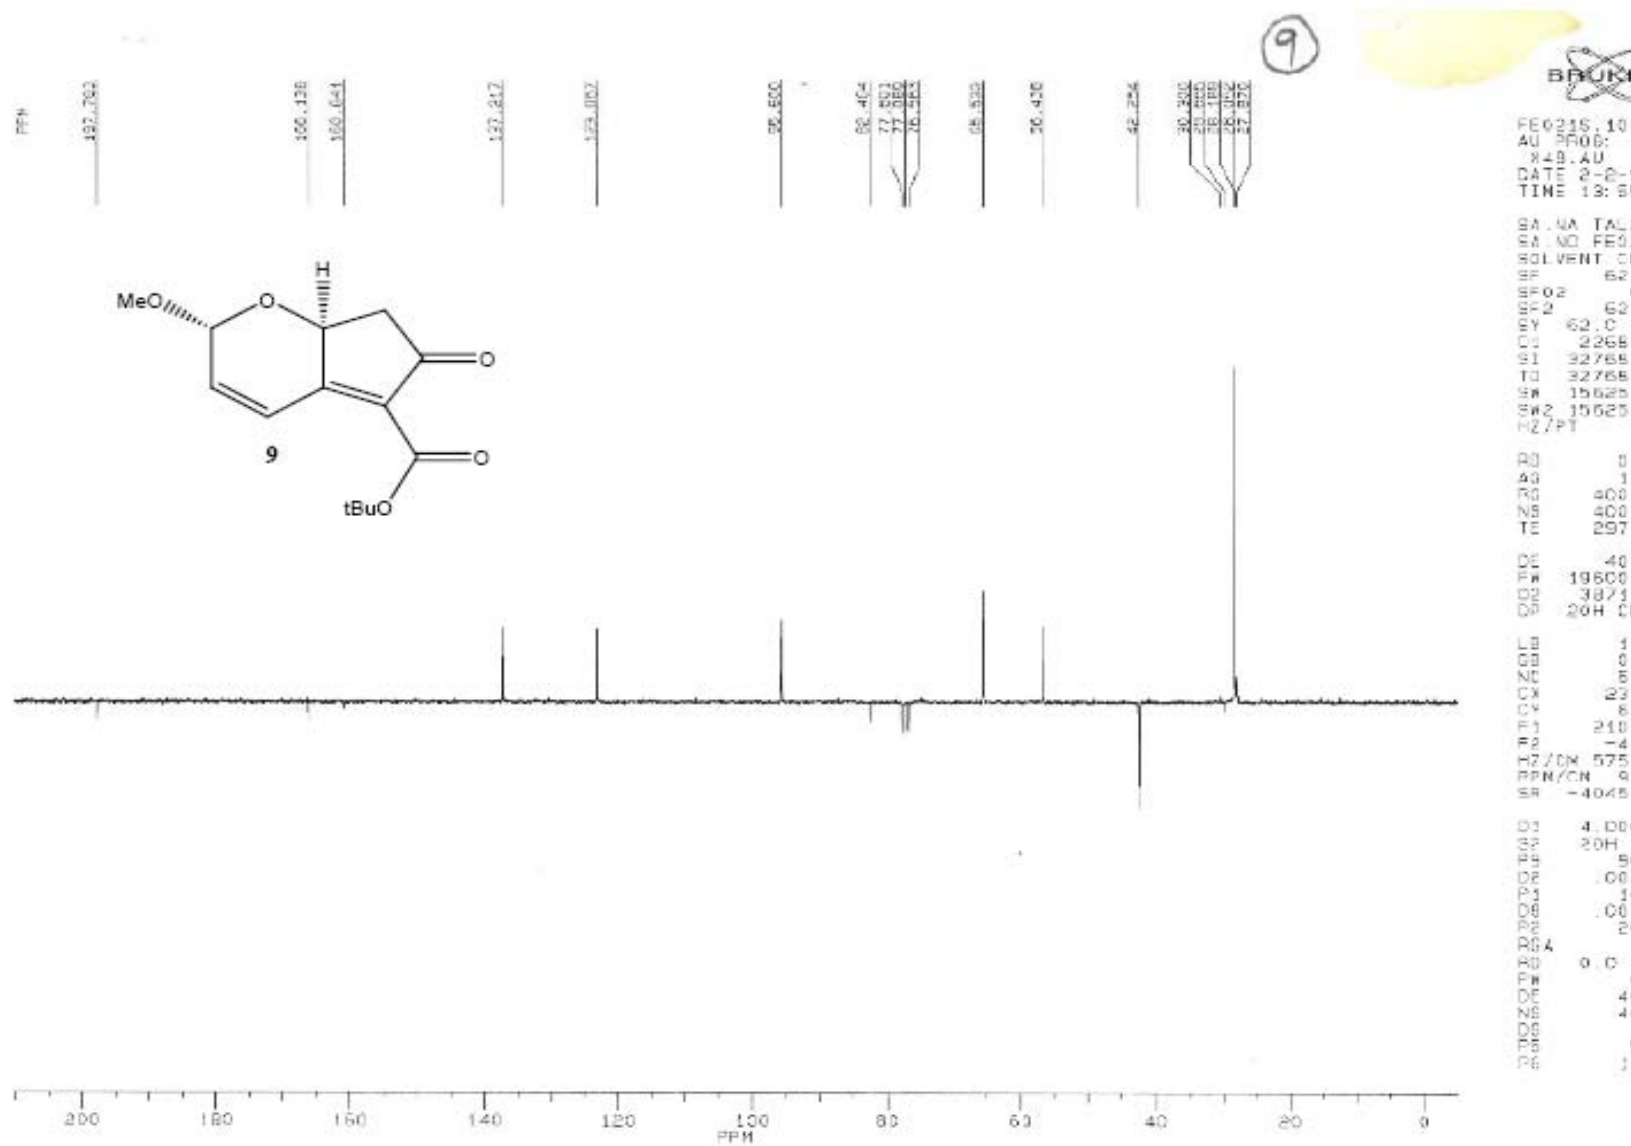

Taleb-2010-10

19 Jan 2010  
TA reduction product

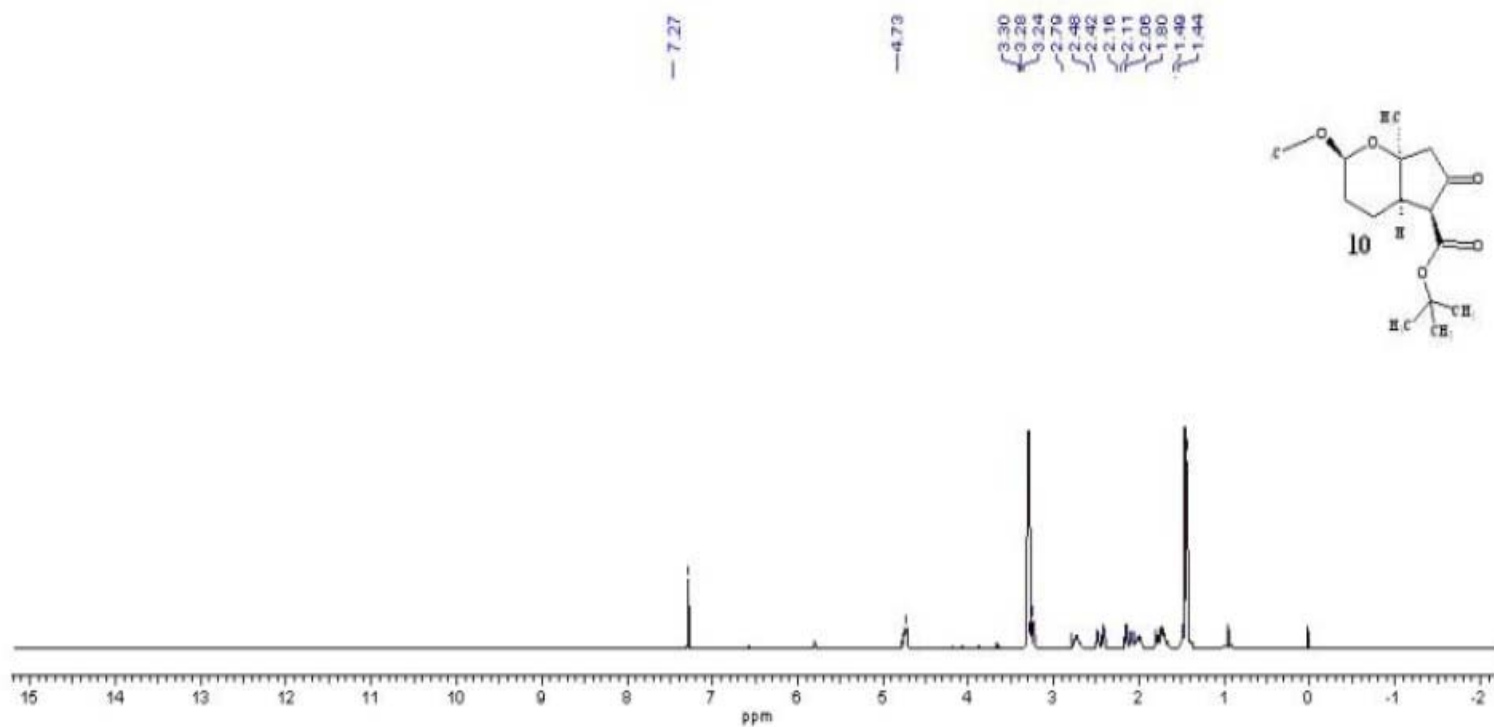



| NUCLEUS                | 13C    | NUMBER OF TRANSIENTS | 2400         | ORIGINAL POINTS COUNT | 32708 | POINTS COUNT     | 202144   |
|------------------------|--------|----------------------|--------------|-----------------------|-------|------------------|----------|
| Pulse Sequence         | zgdc30 | Solvent              | CHLOROFORM-D |                       |       | Sweep Width (Hz) | 18028.85 |
| Temperature (degree C) | 27.000 |                      |              |                       |       |                  |          |

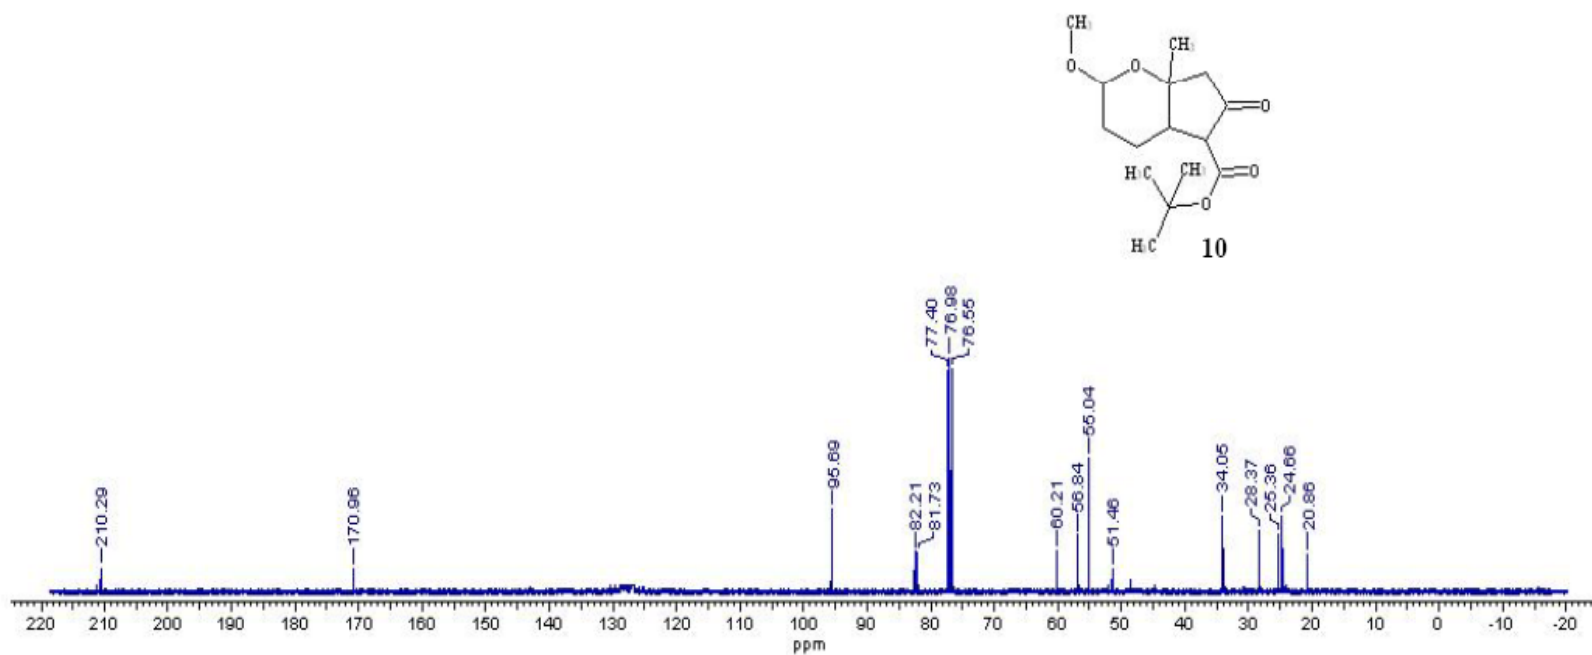

### Taleb-2010-11a

18 Jan 2010  
TA methylhydrazine 11a

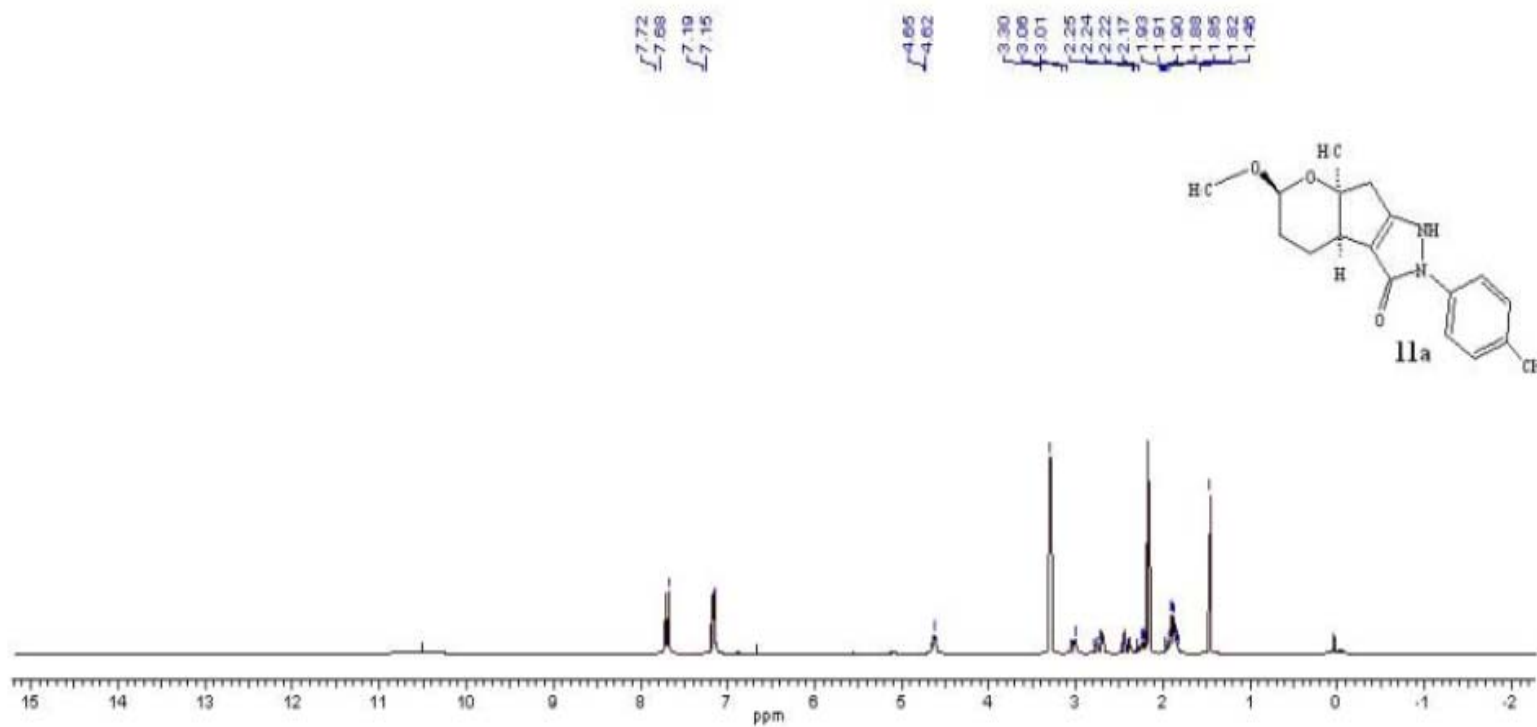

| File Name              | C:\Documents and Settings\user\Desktop\11A-KA-US-NEW\11A-KA-AZ\11A-KA-AZ\1B_U110010 |                           | Frequency (MHz)             | FS#                 |
|------------------------|-------------------------------------------------------------------------------------|---------------------------|-----------------------------|---------------------|
| Nucleus                | 13C                                                                                 | Number of Transients 2400 | Original Points Count 32768 | Points Count 262144 |
| Pulse Sequence         | zgpg30                                                                              | Solvent CHLOROFORM-D      | Sweep Width (Hz)            | 18028.85            |
| Temperature (degree C) | 27.000                                                                              |                           |                             |                     |

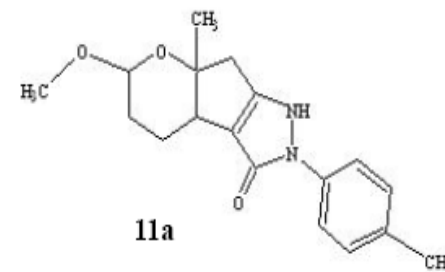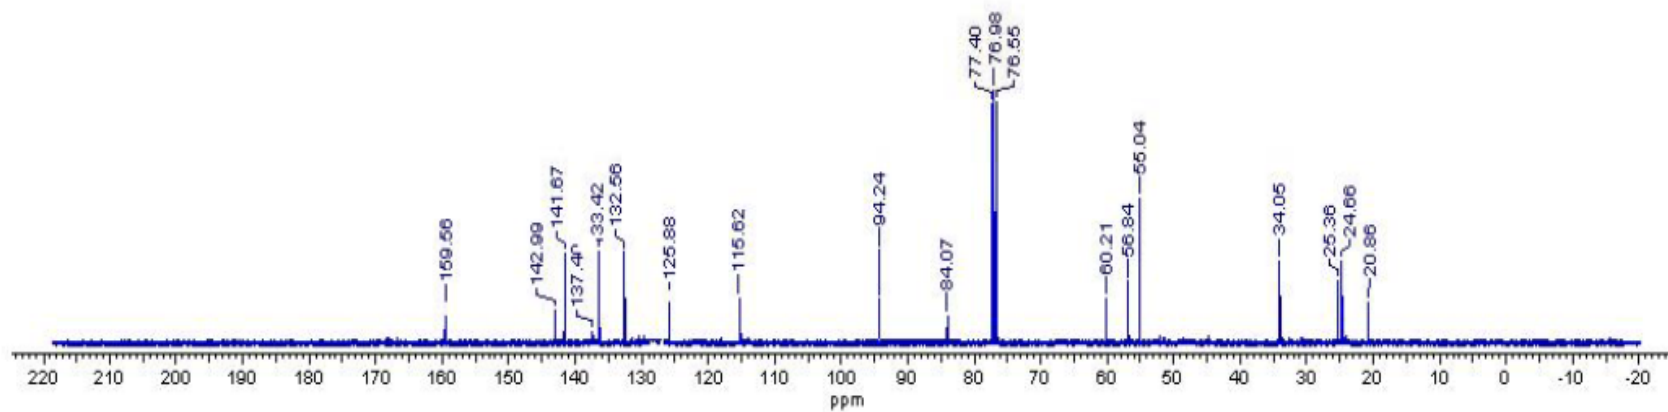

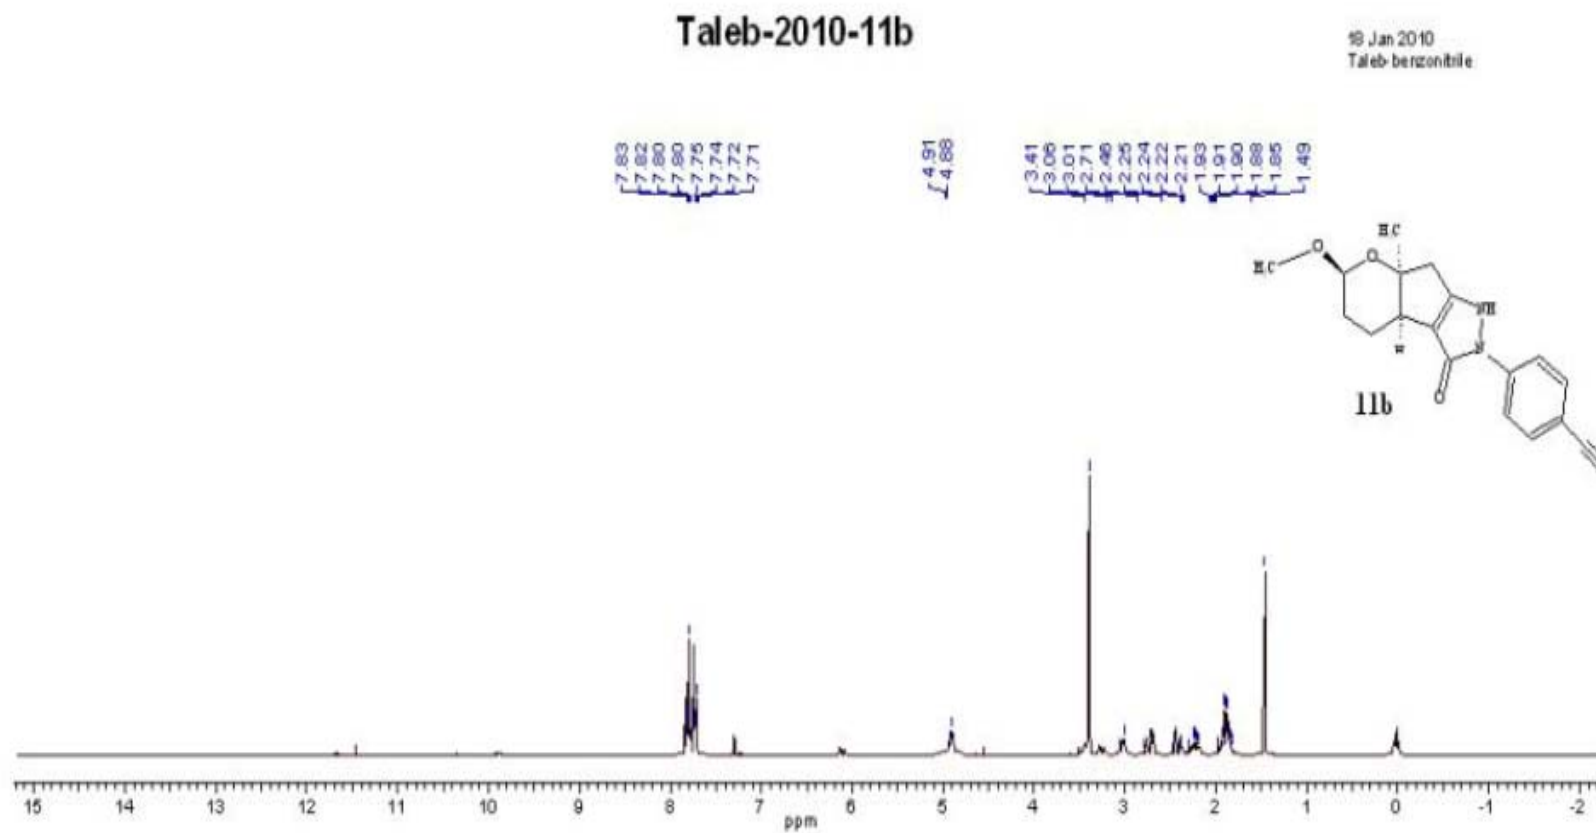

### Taleb-2010-11c

19 Jan 2010  
Taleb-nitorphenyl

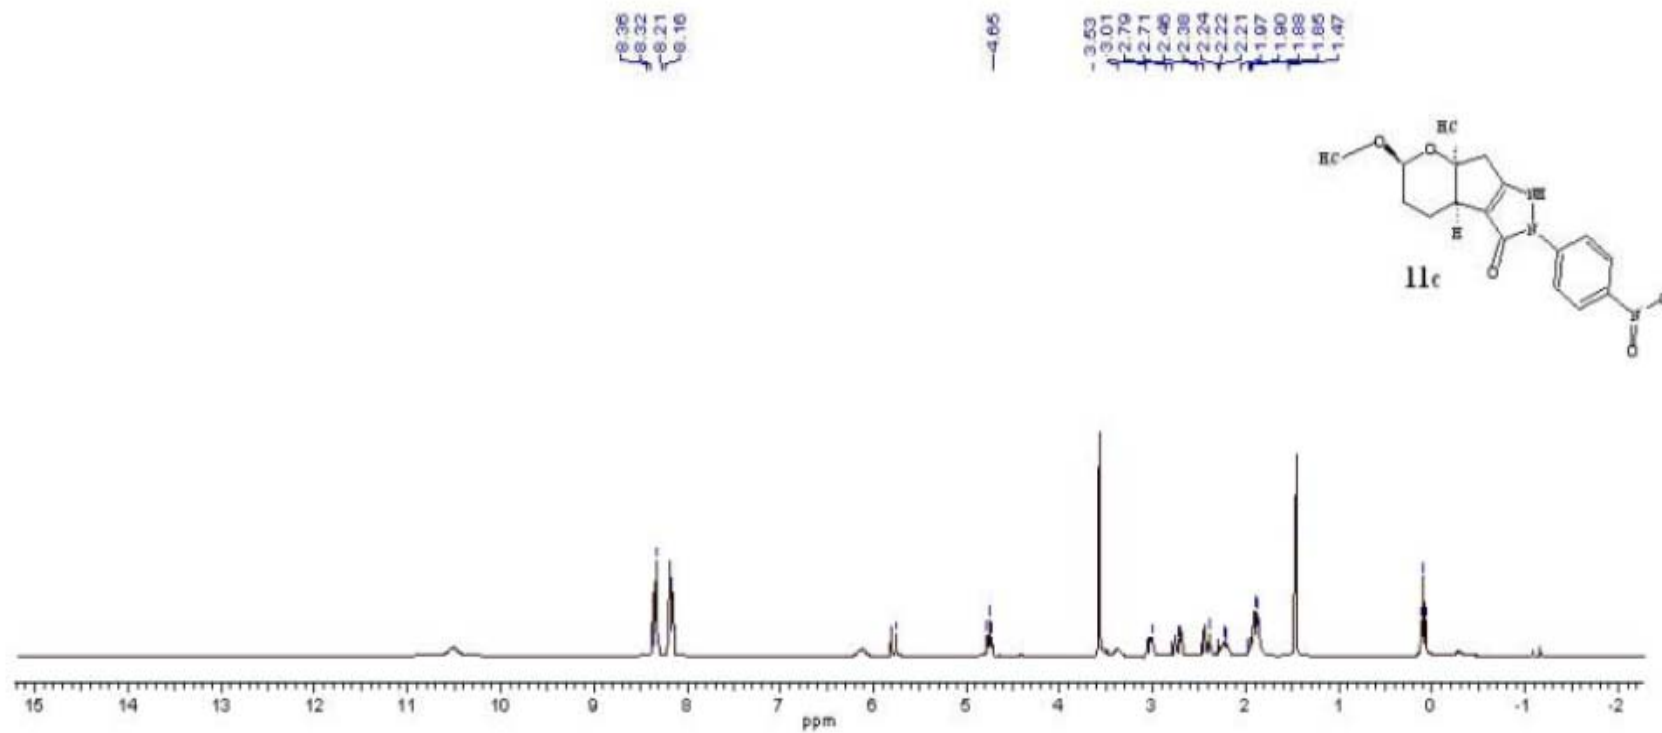

|                       |                 |                             |              |                              |          |                               |        |
|-----------------------|-----------------|-----------------------------|--------------|------------------------------|----------|-------------------------------|--------|
| <i>Nucleus</i>        | <sup>13</sup> C | <i>Number of Transients</i> | 2400         | <i>Original Points Count</i> | 32768    | <i>Points Count</i>           | 32768  |
| <i>Pulse Sequence</i> | zgdc30          | <i>Solvent</i>              | CHLOROFORM-D | <i>Sweep Width (Hz)</i>      | 18028.85 | <i>Temperature (degree C)</i> | 27.000 |

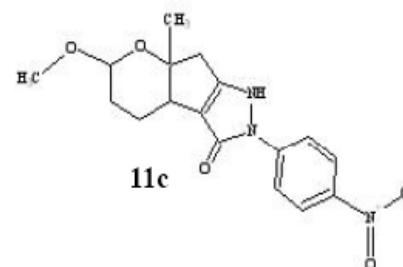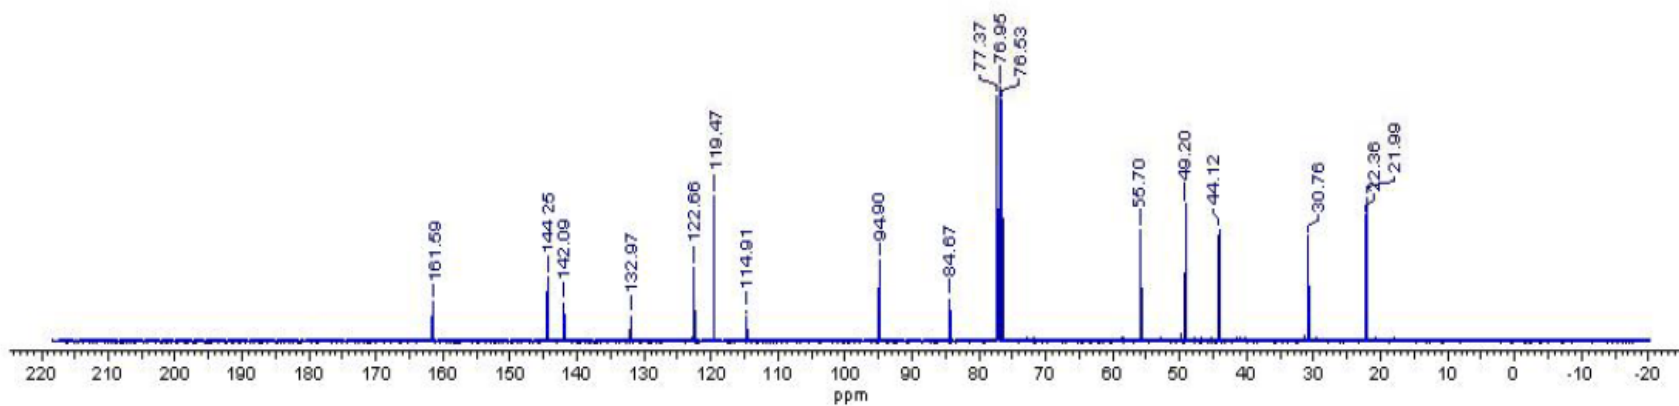

### Taleb-2010-11d

19 Jan 2010  
Taleb-paramethoxy

7.61  
7.57  
7.26  
6.97  
6.93

4.93

3.77  
3.40  
3.06  
2.79  
2.71  
2.46  
2.38  
2.30  
2.22  
1.97  
1.90  
1.88  
1.86  
1.50

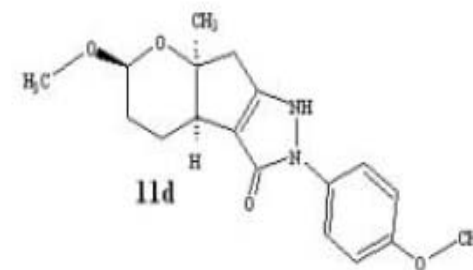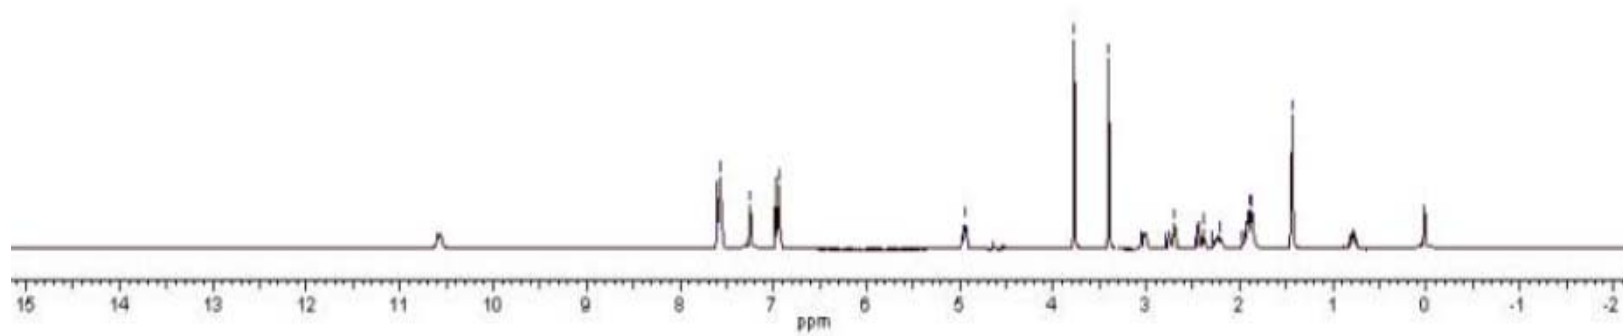

|                       |                 |                             |              |                              |          |                               |        |
|-----------------------|-----------------|-----------------------------|--------------|------------------------------|----------|-------------------------------|--------|
| <i>Nucleus</i>        | <sup>13</sup> C | <i>Number of Transients</i> | 2400         | <i>Original Points Count</i> | 32768    | <i>Points Count</i>           | 32768  |
| <i>Pulse Sequence</i> | zgdc30          | <i>Solvent</i>              | CHLOROFORM-D | <i>Sweep Width (Hz)</i>      | 18028.85 | <i>Temperature (degree C)</i> | 27.000 |

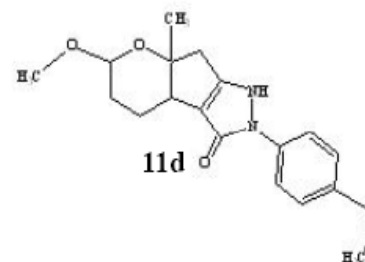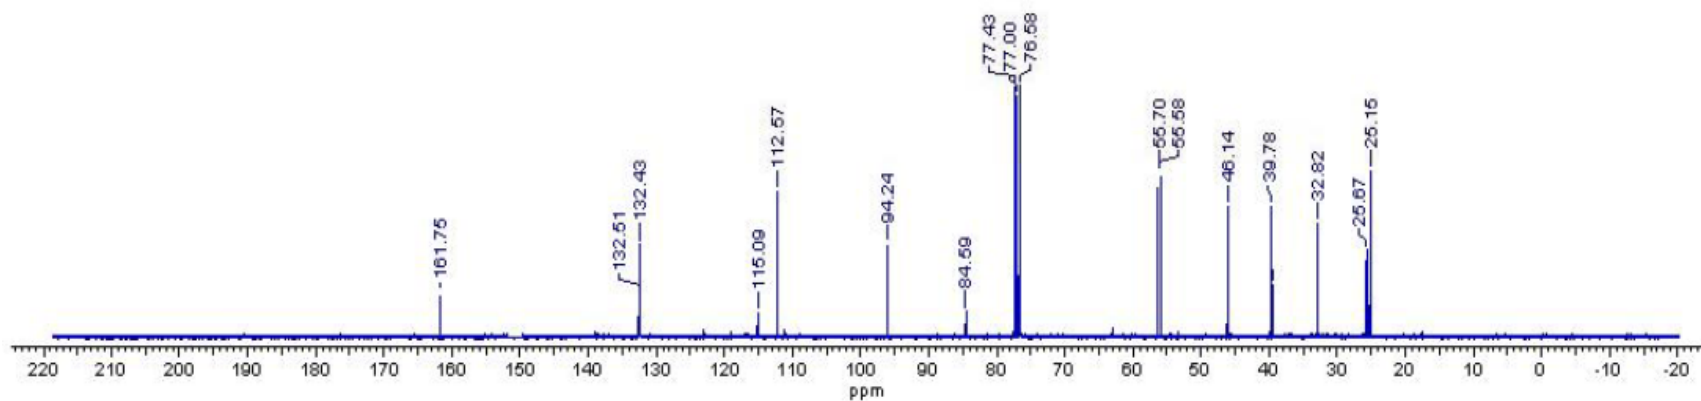



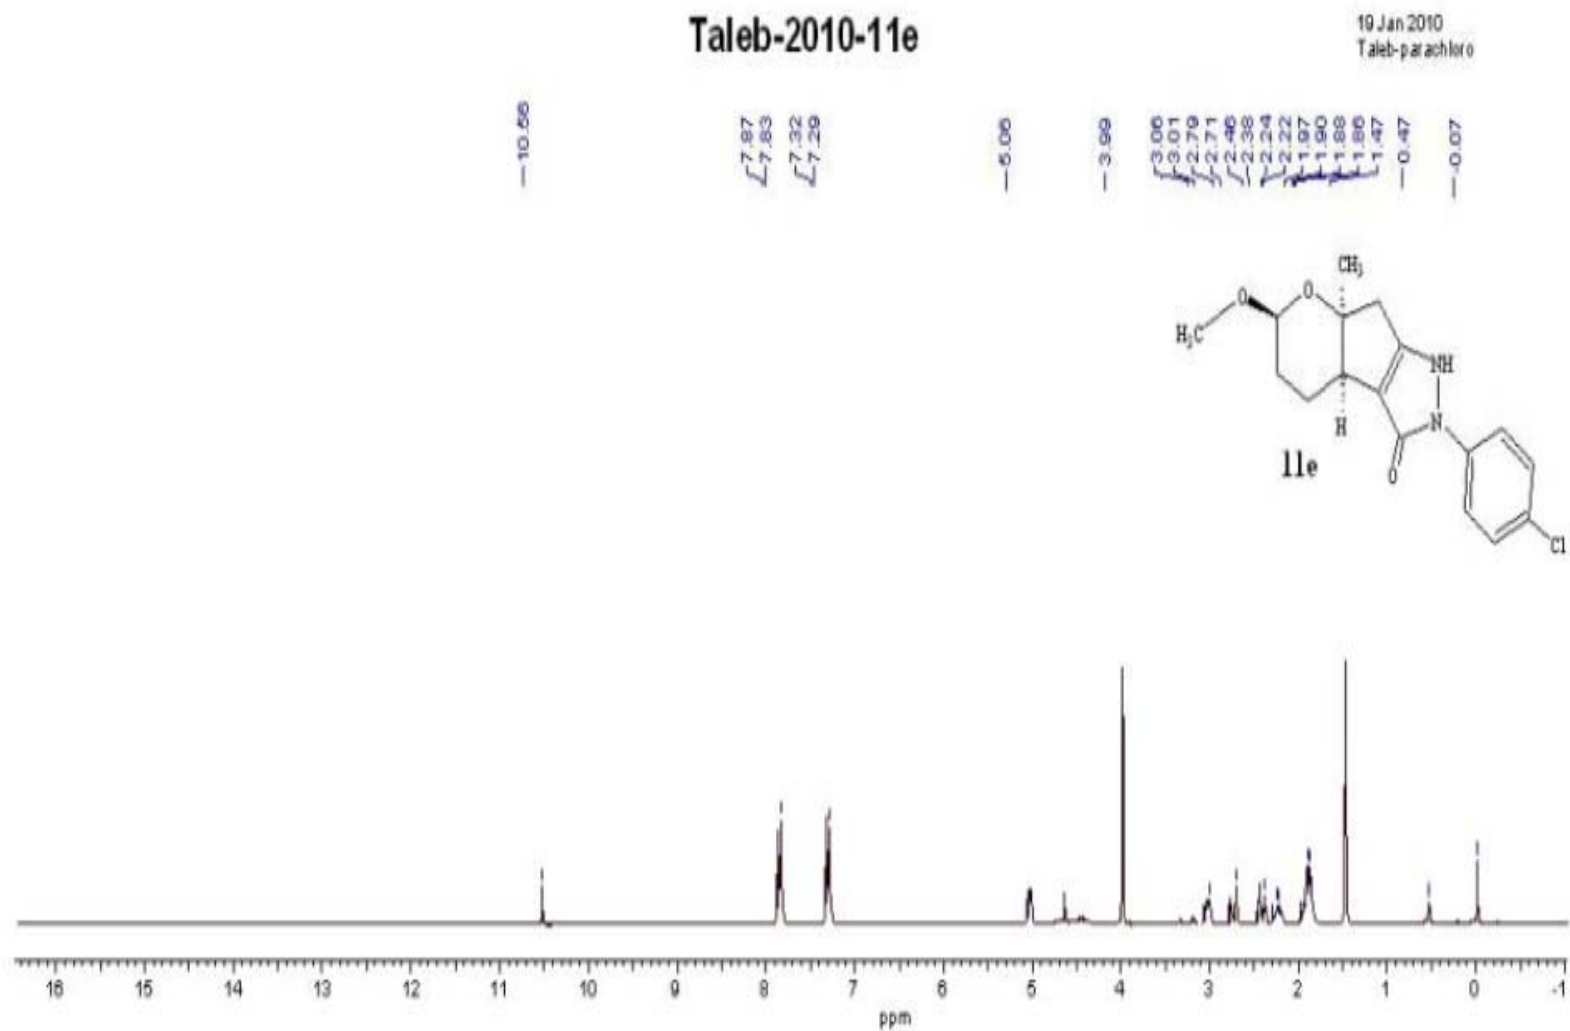

| File Name      | C:\Documents and Settings\user\desktop\11A-RA-USA-Ampyl-Litranon-5010\11A-Ampyl-Litranon-5010_U1100010 |                      |              | Frequency (MHz)        | DS       |
|----------------|--------------------------------------------------------------------------------------------------------|----------------------|--------------|------------------------|----------|
| Nucleus        | 13C                                                                                                    | Number of Transients | 2400         | Original Points Count  | 32768    |
| Pulse Sequence | zgdc30                                                                                                 | Solvent              | CHLOROFORM-D | Sweep Width (Hz)       | 18028.85 |
|                |                                                                                                        |                      |              | Temperature (degree C) | 27.000   |

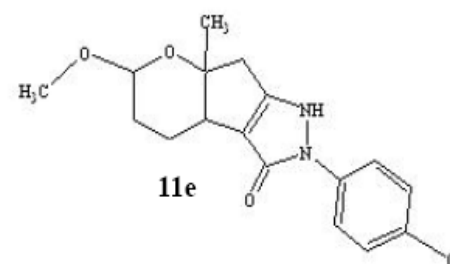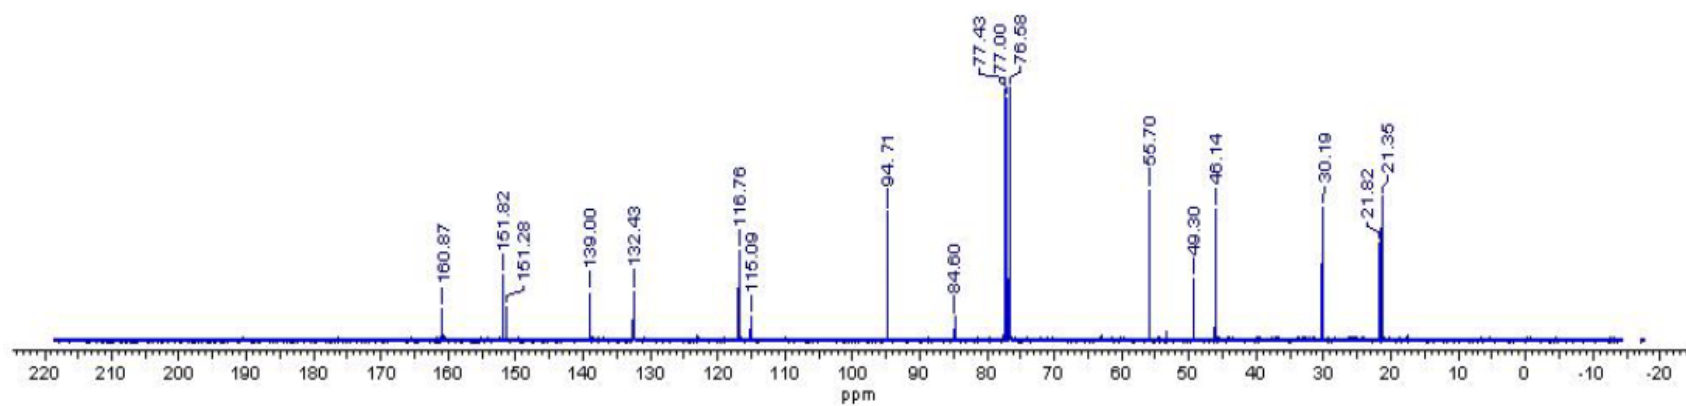

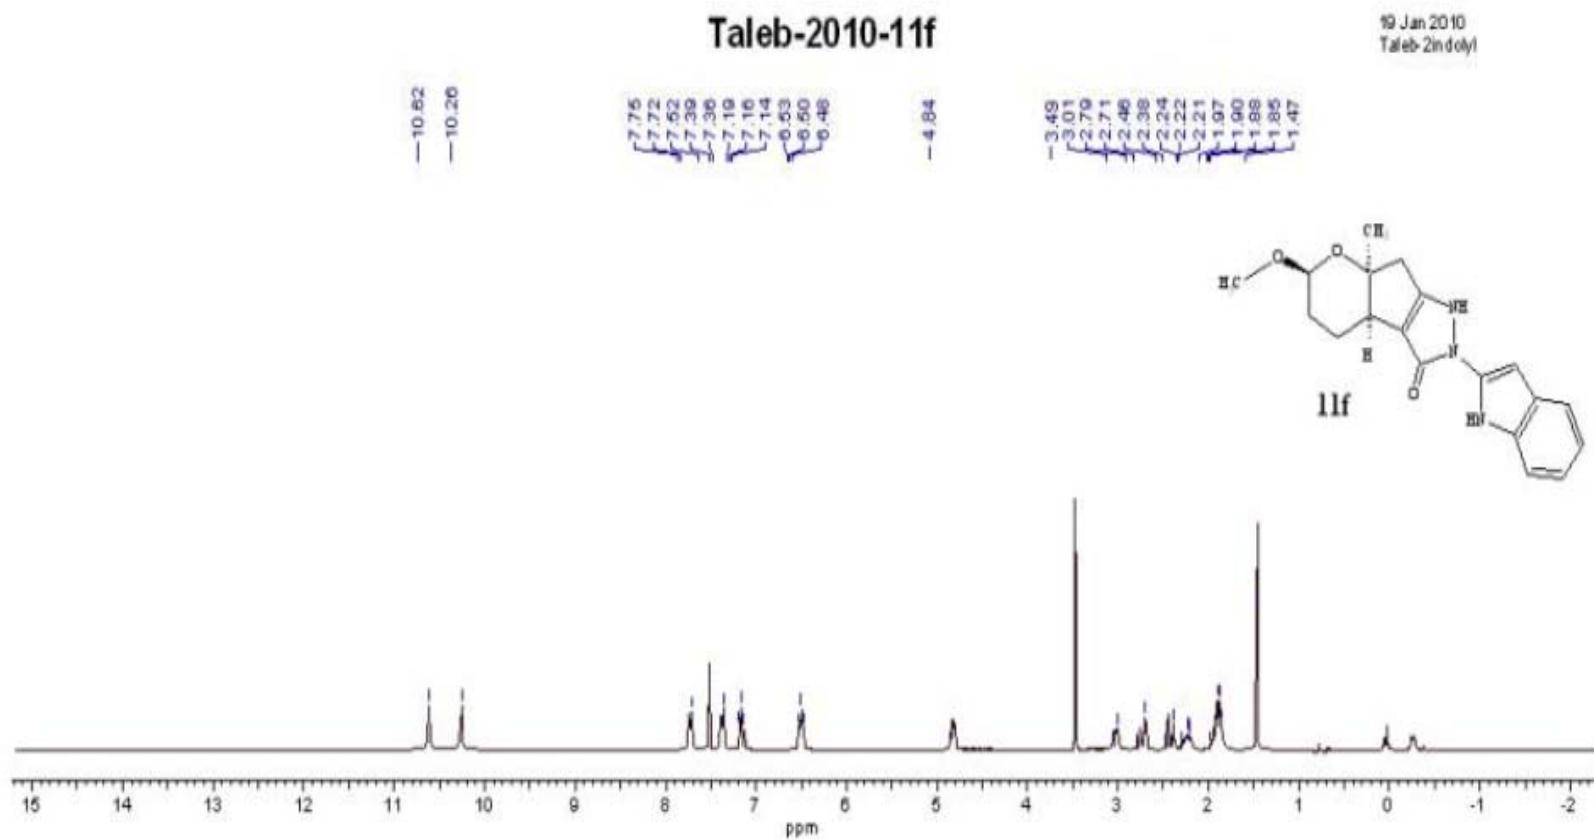

Taleb-2010-11g

19 Jan 2010  
Taleb-2-pyridnyl

8.42  
8.40  
7.84  
7.81  
7.66  
7.63  
7.61  
7.01  
6.88  
6.07

5.21  
5.19  
5.16

3.77  
3.09  
2.79  
2.71  
2.49  
2.38  
2.24  
2.22  
2.21  
1.97  
1.80  
1.88  
1.85  
1.42

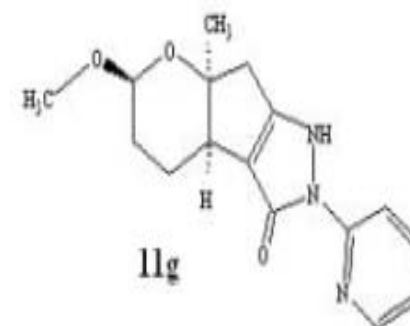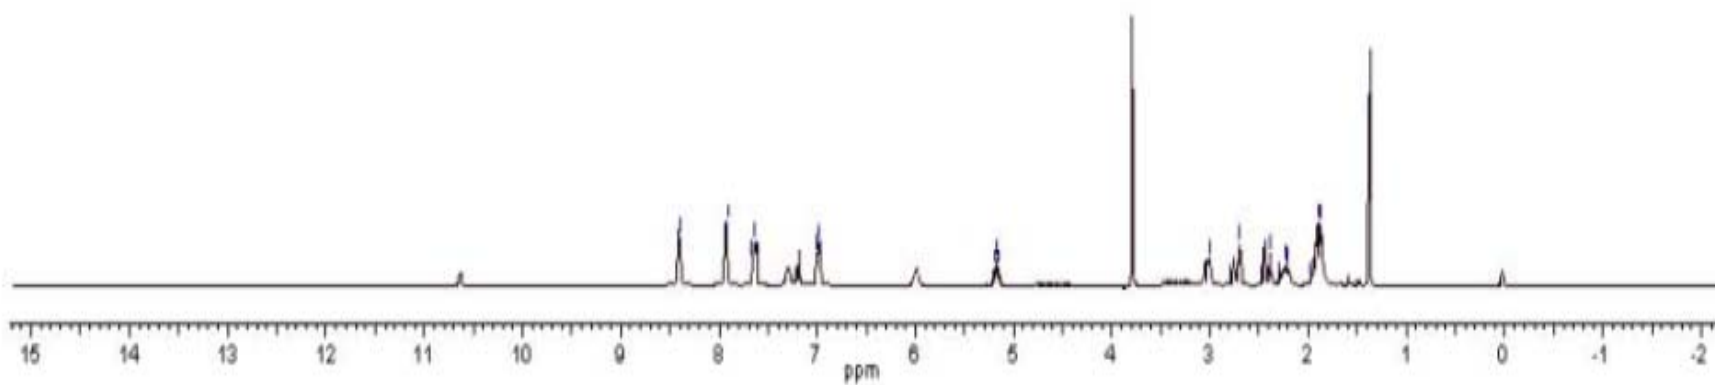

Supplement: c0ob00289e.pdf [file c0ob00289e.pdf]
